1 **Compliance with Covid-19 measures: evidence from New**

2 **Zealand**

3

4 Geoff Kaine<sup>1\*</sup>, Suzie Greenhalgh<sup>2</sup> and Vic Wright<sup>3</sup>

5

6 <sup>1</sup> Manaaki Whenua Landcare Research, Hamilton, New Zealand

7 <sup>2</sup> Manaaki Whenua Landcare Research, Auckland, New Zealand

8 <sup>3</sup> University of New England, Armidale, New South Wales, Australia

9

10 \* Corresponding author.

11 Email: [kaineg@landcareresearch.co.nz](mailto:kaineg@landcareresearch.co.nz) (GK)

12

13 These authors contributed equally to this work.

14

## 15 **Abstract**

16 Governments around the world are seeking to slow the spread of Covid-19 by implementing  
17 measures that encourage, or mandate, changes in people’s behaviour. These changes include  
18 the wearing of face masks, social distancing, and testing and self-isolating when unwell. The  
19 success of these measures depends on the commitment of individuals to change their  
20 behaviour accordingly. Understanding and predicting the motivation of individuals to change  
21 their behaviour is therefore critical in assessing the likely effectiveness of these measures in  
22 slowing the spread of the virus.

23

24 In this paper we draw on a novel framework, the I<sub>3</sub> Compliance Response Framework, to  
25 understand and predict the motivation of residents in Auckland, New Zealand, to comply  
26 with measures to prevent the spread of Covid-19. The Framework is based on two concepts.  
27 The first uses the involvement construct to predict the motivation of individuals to comply.  
28 The second separates the influence of the policy measure from the influence of the policy  
29 outcome on the motivation of individuals to comply.

30

31 In short, the Framework differentiates between the strength of individuals’ motivation and  
32 their beliefs about the advantages and disadvantages of policy outcomes and policy measures.  
33 We found this differentiation was useful in predicting an individual’s possible behavioural  
34 responses to a measure and discuss how it could assist government agencies to develop  
35 strategies to enhance compliance.

36

37

38

## 39 **Introduction**

40 The success of measures to slow or stop the spread of Covid-19 such as wearing face masks  
41 and social distancing, depends on the commitment and capacity of individuals to comply with  
42 them, and change their behaviour accordingly [1-3]. Ineffective compliance with these  
43 measures can put the achievement of policy outcomes at risk [4,5]. For example, failure to  
44 wear face masks and socially distance may put the outcome of eliminating Covid-19 from  
45 countries such as New Zealand at risk and may mean considerable resources must be invested  
46 in enforcement to avoid increased rates of infection, higher mortality, and the imposition of  
47 lockdowns causing both economic and psychological damage. Hence, understanding and  
48 predicting the extent to which individuals are motivated to change their behaviour to comply  
49 with measures is critical in assessing how effective these measures are likely to be, and  
50 whether alternatives such as curfews and lockdown can be avoided.

51

52 In this paper we draw on a novel framework, the I<sub>3</sub> Response Framework [6], to understand  
53 and predict the motivation of residents of Auckland, the largest city in New Zealand, to  
54 comply with measures to prevent the spread of Covid-19, such as the wearing of face masks,  
55 self-isolating when unwell, and getting tested for Covid-19. Auckland is the port of entry for  
56 many people coming to New Zealand and therefore at high risk of frontline border workers  
57 being exposed to the virus. The Framework is applied to model the engagement with, and  
58 beliefs and feelings about, government measures proposed or taken to deal with some policy  
59 outcome. The target group is composed of those whose acceptance of the measures, which is  
60 not inevitable, is essential for the achievement of the desired policy outcome. Our aim was to  
61 test the proposition that compliance with policy measures to prevent the spread of Covid-19

62 depends on people's involvement with the measures (how much an individual cares about  
63 them) as well as their attitude towards them.

64

65 Fundamentally, the Framework differentiates between the strength of individuals' motivation  
66 and their beliefs about the advantages and disadvantages of policy outcomes and policy  
67 measures. We found this differentiation was useful in predicting an individual's possible  
68 behavioural responses to a measure, which could assist government agencies to develop  
69 strategies to enhance compliance. With respect to preventing the spread of Covid-19 in New  
70 Zealand we found that Auckland residents' willingness to wear face masks and self-isolate if  
71 unwell depended on the strength of their involvement (motivation) with, as well as their  
72 attitudes towards, both the policy outcome (preventing the spread of Covid-19) and the policy  
73 measures themselves (wearing face masks and self-isolating if unwell).

74

75 The results highlight the importance of distinguishing unintentional non-compliance with  
76 respect to wearing face masks, self-isolating when unwell, and testing from deliberate non-  
77 compliance, and tailoring enforcement strategies appropriately. The results also highlight the  
78 difficulty of communicating effectively through mass media with those who have low  
79 involvement with preventing the spread of Covid-19. They draw attention to the importance  
80 of distinguishing between those with low and high involvement in considering the possible  
81 effects on compliance of the dissemination of misinformation about Covid-19 through social  
82 media.

83

84

85

## 86 Theory

87 Kaine et al. [6] proposed that theories about people’s responses to policy measures have a  
88 common underpinning, whether grounded in the economics of rational choice or more  
89 behavioural, such that people’s decision-making is motivated by the achievement of personal  
90 goals, and the importance of a decision to an individual influences the extent to which they  
91 will devote cognitive effort to gathering information, processing that information,  
92 formulating attitudes, and reaching a decision. Kaine et al. [6] suggested that these theories  
93 cannot be expected to predict behaviour when a decision is not perceived to be important  
94 enough (i.e. sufficiently relevant to people’s personal goals) to trigger the effort required to  
95 form an attitude that has the power to influence their behaviour. Consequently, to predict how  
96 people may or may not respond to any given policy measure, it is necessary to understand  
97 whether they are likely to invest effort in decision-making regarding that measure.

98

99 As explained in detail in Kaine et al. [6], the effort people will devote to decision-making  
100 about complying with a policy measure will depend on their *involvement* with the policy  
101 *issue* (in this case the policy outcome of eliminating Covid-19 from New Zealand) and the  
102 *intervention* (the policy measure, such as wearing face masks, self-isolating if unwell and  
103 being tested for Covid-19), with the former being an important component of the context for  
104 the latter. These concepts underpin the I<sub>3</sub> Framework<sup>1</sup> used in this analysis.

105

106 In a specific applied setting, such as a policy to eliminate Covid-19, the I<sub>3</sub> Framework  
107 enables the prediction of likely compliance with policy measures, and given the reasons for  
108 their involvement and their attitudes, the best ways to enhance that compliance. The

---

<sup>1</sup> *Involvement, issue and intervention, hence I<sub>3</sub> Framework.*

109 behaviour changes to be analysed with the I<sub>3</sub> Framework occur in a public policy context  
110 rather than a commercial context. This means the outcome(s) sought are typically declared,  
111 and government, or its agencies, intervene with measures designed to modify behaviour in  
112 pursuit of the outcome(s). Either compulsion or voluntary responses may be involved, but  
113 compliance is central to achieving outcomes. In what follows in this section we have drawn  
114 extensively on the discussion of the interpretation of Framework findings from Kaine et al.  
115 [6] to make it readily accessible for the reader.

116

### 117 **The I<sub>3</sub> Framework**

118 Kaine et al. [6] proposed that people's responses to policy measures, such as the requirement  
119 to wear face masks, can be inferred from their:

- 120 • involvement with the relevant policy outcome (preventing the spread of Covid-19)
- 121 • involvement with and attitude towards the policy measure itself (e.g. wearing face  
122 masks).

123

124 Involvement with the policy measure signals the degree to which the measure itself is a  
125 source of motivation for the individual, irrespective of the policy issue [7, 8]. This allows for  
126 the possibility that individuals are motivated to act in response to a measure even though they  
127 do not perceive the policy outcome the measure addresses is relevant to them. In such  
128 situations, it may be that the wish to comply is motivated by involvement with some other  
129 outcome, such as achieving perceived conformity with social norms [9].

130

131 However, the perceived relevance of a policy outcome is plainly relevant to an individual's  
132 cognitions about related measures. One would expect a positive correlation between  
133 involvements with each. The value of the Framework is that it enables a decomposition of

134 overall involvement with a policy outcome and corresponding measures, as well as  
135 distinguishing between involvement with different measures and closer analysis of the role of  
136 beliefs held by individuals, as informational contexts for attitudes.

137

138 The two dimensions of involvement with the policy outcome and involvement with the policy  
139 measure mean that the responses of people to a policy measure can be classified into four  
140 quadrants, as shown in Fig 1.

141

142 **Fig 1. Map and explanation of quadrants in the I<sub>3</sub> framework.**

143

144 People in quadrant 1 exhibit low involvement in both the policy outcome and the policy  
145 measure. These people are likely to have little knowledge, or even awareness, of the policy  
146 outcome and are likely to have limited knowledge of the policy measure, and to have weak  
147 attitudes towards it, if any at all. In terms of Kassirjian [10], these people may appear to be  
148 either detached (i.e. they have other interests and concerns) or ‘know-nothings’ (people who  
149 do not particularly care about or have no interest in the outcome). Non-compliance with the  
150 measure is largely unintentional [11]. Chaffee and Roser [12, p. 376] describe their behaviour  
151 as being ‘a direct response to situational constraints and not especially reflective of one’s  
152 attitudes or knowledge.’

153

154 If people in quadrant 1 present little risk in terms of achieving aggregate policy outcome  
155 targets, they can be ignored [6]. Otherwise, their compliance with the measure may be  
156 encouraged by:

- 157 • linking the policy outcome to a subject they find more involving
- 158 • reducing the effort required to be compliant

159 • promoting awareness of the policy outcome and the policy measure.

160 However, because people in this quadrant are disinterested, they are unlikely to pay attention  
161 to promotional messaging, hence the last strategy of promoting awareness is likely to be  
162 ineffective. Kim [7] suggests that an affect-evoking strategy (i.e. one that evokes an  
163 emotional response) should be the most effective means of attracting attention under these  
164 circumstances. This is most likely to be achieved by focusing on the policy outcome as low  
165 involvement, with the outcome acting as a hurdle to greater involvement with individual  
166 measures.

167

168 People in quadrant 2 exhibit high involvement with the policy outcome but low involvement  
169 with the measure. Consequently, they would be aware of the outcome and invest time and  
170 energy in processing information, decision-making and responding to the outcome [12, 13].  
171 They may have limited knowledge of the policy measure and may have weak or ambiguous  
172 attitudes towards it. Any non-compliance with the measure is largely unintentional [6].

173

174 If people in quadrant 2 represent little risk in terms of achieving the policy outcome they can  
175 be ignored. If their compliance is important to achieving the policy outcome, reducing the  
176 effort required for compliance [14] and promoting awareness of the policy measure may be  
177 worthwhile by taking advantage of the intensity of their involvement with the policy  
178 outcome, particularly when this is accompanied by favourable attitudes.

179

180 People in quadrant 3 exhibit high involvement with both the policy outcome and the measure.  
181 These people are likely to have extensive and detailed knowledge of the policy outcome.  
182 They are also likely to have extensive knowledge of the policy measure and strong attitudes  
183 towards it [13]. If their attitude towards the policy measure is favourable, they will comply



184 with the measure and may even advocate for it [11]. Consequently, a strategy for promoting  
185 compliance among individuals in this quadrant with a favourable attitude might focus on self-  
186 regulation, using mechanisms such as voluntary codes of conduct. Promotion and monitoring  
187 may also be worthwhile to ensure awareness and knowledge of obligations, ensure desirable  
188 behaviours are maintained, and identify at an early stage any changes in their attitude [6].

189

190 If people in quadrant 3 have an unfavourable attitude towards the policy measure, they may  
191 comply, but reluctantly [6]. Non-compliance with the measure will be intentional. Most likely  
192 they will prefer – and even advocate for – changes to the design of the policy measure. Where  
193 practical, incorporating these changes may encourage the compliance of these people [15].  
194 Alternatively, offering incentives to reduce compliance costs may neutralise unfavourable  
195 reactions.

196

197 Another strategy for promoting compliance among individuals in this quadrant with an  
198 unfavourable attitude is to change their attitude towards the measure. This may be possible by  
199 reframing the benefits of the measure in terms of another, more involving subject [6], thus  
200 provoking a recalculation of net costs and benefits. Alternatively, a promotional programme  
201 may be implemented with the outcome of persuading these individuals they are mistaken, and  
202 that the behaviours required by the policy measure are superior to any alternatives. Finally,  
203 compliance among these individuals might be increased by investing resources in  
204 enforcement, to increase the likelihood of detection and prosecution, and legislating severe  
205 penalties for non-compliance.

206

207 Note that if the causes of non-compliance relate to unpredictable variations in the  
208 environment, or to unforeseeable technical problems, then enforcement and general

209 deterrence may be ineffective. A more appropriate strategy in these circumstances may be to  
210 focus on the provision of technical assistance [16, 17].

211

212 People in quadrant 4 exhibit low involvement with the policy outcome but high involvement  
213 with the measure. People in this quadrant are likely to have limited knowledge of the policy  
214 outcome. They are likely to have detailed knowledge of the policy measure and have strong  
215 attitudes towards it [13]. If their attitude towards the measure is favourable, then they will  
216 comply with the measure [6]. In these circumstances, the government agency may play a  
217 monitoring role to check the conditions promoting compliance do not change. A promotional  
218 strategy to support and reinforce compliance behaviour may also be worthwhile.

219

220 On the other hand, if the members of this quadrant have an unfavourable attitude towards the  
221 policy measure, they will only comply reluctantly, or may intentionally refuse to comply at  
222 all. These people will regard the measure as imposing unwarranted costs upon them. Most  
223 likely they will agitate against the policy measure [6] because they are not committed to the  
224 outcome. One strategy for promoting compliance among these individuals is to change their  
225 attitude towards the measure. This may be possible by reframing it in terms of another, more  
226 involving subject [6]. Offering incentives to offset compliance costs, or delaying or staging  
227 the introduction of policy measures, may neutralise unfavourable reactions [15]. Finally,  
228 compliance among these individuals might be increased by investing resources in  
229 enforcement to increase the likelihood of detection and prosecution of, and by introducing  
230 severe penalties for, non-compliance.

231

232 In summary, Kaine et al. [6] hypothesised that individual responses to policy measures will  
233 depend on the intensity and source of involvement of the individual with the measure and,

234 where that involvement is sufficiently intense to form an attitude, on whether that attitude is  
235 favourable or unfavourable. The I<sub>3</sub> Framework has been employed to understand and predict  
236 compliance behaviour in a variety of contexts in agriculture [16, 18, 19, 20], rural and urban  
237 predator control [21, 22], and community support for predator control [23]. The results of  
238 these studies suggests the Framework has predictive and differential validity with respect to  
239 compliance behaviour and discriminant validity with respect to attitudes.

240

### 241 **Covid-19 in New Zealand**

242 Covid-19 was first detected in New Zealand on 28 February 2020 [24]. Within three weeks  
243 the central government had closed New Zealand's international border to all except returning  
244 citizens and permanent residents. The government began pursuing a restrictive strategy [25]  
245 of eliminating Covid-19 and applied a range of control measures to stop the transmission of  
246 Covid-19 in New Zealand [26]. Elimination did not necessarily mean eradicating the virus  
247 permanently from New Zealand; rather, that central government was confident chains of  
248 transmission in the community had been eliminated for at least 28 days, and any cases  
249 imported from overseas in the future could be effectively contained [26].

250

251 The central government instituted a four-tier alert system that mandated measures such as:  
252 progressively tighter restrictions on people's movement outside their homes and immediate  
253 families, including travelling to work; social distancing and encouraging the wearing of  
254 masks outside the home at the higher alert levels; and self-isolating and seeking testing if  
255 people felt unwell or experienced symptoms characteristic of Covid-19 infection [24].

256

257 On 25 March New Zealand moved to a Level 4 'lockdown', the highest level of alert and a  
258 National State of Emergency was declared [24]. At this alert level people were instructed to

259 stay at home except for essential personal movement such as health or essential shopping,  
260 safe recreational activity is allowed in the local area, and travel is severely limited. All  
261 gatherings are cancelled, and all public venues are closed. Businesses are closed except for  
262 essential services (for example, supermarkets, pharmacies, health clinics, petrol stations and  
263 lifeline organisations). All educational facilities are closed [24].

264

265 As the spread of the virus slowed and stopped, the country progressively moved to lower alert  
266 levels: Level 3 towards the end of April and Level 2 in early May. Alert Level 1 was re-  
267 introduced on 8 June because community transmission had halted and there were no active  
268 cases in the country outside the Managed Isolation and Quarantine facilities (MIQ)  
269 specifically established to quarantine all incoming travellers to New Zealand for 14 days after  
270 arrival. If a traveller tested positive for Covid-19 at any time during the 14 days, they were  
271 moved to another quarantine facility for people with Covid-19 [24].

272

273 However, on 11 August 2020 four new cases were detected in Auckland. Auckland returned  
274 the next day to Alert Level 3 with the rest of the country at Alert Level 2. Auckland remained  
275 at Alert Level 3 until 30 August, when it moved to Level 2, with additional restrictions on  
276 travel and the size of gatherings. The rest of the country remained at the standard Alert Level  
277 2 until 21 September, when the alert level was downgraded to Level 1. The extra restrictions  
278 on Auckland residents were relaxed on 21 September and they returned to Alert Level 1 on 7  
279 October 2020 [24].

280

## 281 **Materials and methods**

282 A questionnaire seeking information from the public on their beliefs about, attitudes towards,  
283 and willingness to wear face masks, self-isolate and be tested for Covid-19 was designed

284 based on the I<sub>3</sub> Compliance Framework [6]. Involvement was measured using a condensed  
285 version of the Laurent and Kapferer [27] involvement scale developed by Kaine [28], with  
286 respondents rating two statements on each of the five components of involvement (functional,  
287 experiential, identity-based, risk-based, and consequence-based). Attitudes were measured  
288 using a simple, evaluative scale, while the strength of respondents' attitudes, which were  
289 expected to vary depending on the strength of their involvement, was measured using an  
290 ipsative scale based on Olsen [29].

291

292 A series of questions was formulated to elicit respondents' beliefs about Covid-19,  
293 eliminating Covid-19, wearing face masks, self-isolating and getting tested for Covid-19.  
294 Finally, information was sought on the demographic characteristics of respondents, including  
295 age, education, and ethnicity, and whether they wore masks, would self-isolate and had been  
296 tested for Covid-19.<sup>2</sup>

297

298 The ordering of the statements in the involvement, attitude and belief scales was randomised  
299 to avoid bias in responses. Respondents indicated their agreement with statements in all the  
300 involvement, attitude and belief scales using a five-point rating, ranging from strongly  
301 disagree (1) to strongly agree (5). The questionnaire is reproduced in S1.

302

303 Participation in the survey was voluntary, respondents could leave the survey at any time, and  
304 all survey questions were optional and could be skipped. The research approach was  
305 reviewed and approved by the Manaaki Whenua – Landcare Research's social ethics process

---

<sup>2</sup> The ethnicity categories were Māori (the indigenous people of New Zealand), European New Zealander, Pacific Islander, Asian and Other.

306 (application no. 2021/10 NK) which is based on the New Zealand Association of Social  
307 Science Research code of ethics.

308

309 The questionnaire was piloted with a small random sample (n=30), and subsequently  
310 completed by a large random sample (n=1001), of Auckland residents who were members of  
311 a large-scale, commercial consumer internet panel. Auckland was chosen for the survey  
312 because it is New Zealand's largest city and is the mostly likely place for new community  
313 transmission to occur given the number of MIQ facilities and frontline border workers in the  
314 city.

315

316 Panel members receive reward points (which are redeemable for products and services) for  
317 completing surveys. An internet link to the questionnaire was distributed to a random sample  
318 of members of the panel subject to the constraint that they resided in Auckland and were not  
319 minors. The survey was conducted over two weeks from 7 September to 22 September 2020.  
320 Most of this time Auckland residents were under Alert Level 2, which meant they were  
321 expected to maintain social distancing when outside their homes and to wear masks in public  
322 places. They were also expected to keep track of their movements and to self-isolate and seek  
323 testing for Covid-19 if they felt unwell and experienced symptoms associated with Covid-19.

324

325 Given these circumstances, and given the pandemic had been receiving widespread coverage  
326 by mainstream and social media in New Zealand since February 2020, it seems reasonable to  
327 suppose that virtually all Auckland residents were aware of Covid-19 at the time we  
328 conducted our survey and most, if not all, were also aware of the government claims of the  
329 social desirability of wearing face masks and social distancing when out in public, of self-  
330 isolating if feeling unwell and getting tested for Covid-19. While awareness of the existence

331 of Covid-19 is a prerequisite for involvement with it, awareness does not necessarily entail  
332 involvement. Widespread awareness of Covid-19 simply creates the potential for widespread  
333 involvement. The extent to which that potential is realised depends on respondents' beliefs  
334 about how Covid-19 could affect the achievement of their functional, experiential and self-  
335 identity needs.

336

337 Awareness among Auckland residents of the social desirability of wearing face masks and  
338 social distancing when out in public, and of self-isolating if feeling unwell and getting tested  
339 for Covid-19, creates the strong possibility that self-reported past or likely future compliance  
340 with these preventive measures may be over-reported. Daoust et al. [30, 31], for example,  
341 found this was the consistently case with respect to self-reported behaviour in the context of  
342 Covid-19 across a dozen countries, reporting compliance inflation of around 10% as a result  
343 of the design of survey questions [31]. Daoust et al. [31] found that this bias appeared to be  
344 consistent across gender, age, and education categories, which means the bias does not affect  
345 inferential comparisons made across these categories. However, the influence of bias in self-  
346 reporting socially desirable behaviours (or opinions) in the context of the categories in the I<sub>3</sub>  
347 Framework is less clear (see the Discussion for more on this particular matter).

348

349 The focus of our survey is on the determinants of behavioural intentions and cognitive  
350 attention to messages. Where self-reported behaviour was sought in our survey, it was in the  
351 context of prior questions that explored impediments to, and specific aspects of, compliance  
352 and allowed a range of degrees, or frequency, of compliance rather than binary responses  
353 [30]. To this extent, the questioning effects that might evoke compliance bias in responses  
354 seem intrinsically weaker in this study compared to those reported in Daoust et al. [30, 31].

355 As well, the online character of the survey reduces, if not removes [31], possible interviewer–  
356 based effects favouring over-reporting of compliance.

357

358 Of the 1,001 completed responses (giving a 99% confidence interval that population values  
359 are within 5% of the survey values), 53% were from women and 47% were from men. The  
360 age distribution aligned with the distribution for Auckland in the 2018 New Zealand Census,  
361 but Māori and Pacific Island residents were under-represented in the sample while European  
362 New Zealand residents were over-represented. Very-low-income households (<\$20,000) and  
363 very-high-income households (>\$100,000) were under-represented in the sample, while low-,  
364 middle- and high-income households were over-represented. Residents with secondary or  
365 certificate qualifications were substantially under-represented in the sample, while residents  
366 with graduate and postgraduate qualifications were substantially over-represented (see  
367 Appendix A).

368

369 Involvement scores were computed for each respondent as the simple arithmetic average of  
370 their agreement ratings for the 10 statements in the involvement scales. Attitudes scores were  
371 computed as the simple arithmetic average of their agreement ratings for the five statements  
372 in the attitude scales. Respondents were classified into belief segments based on their  
373 agreement ratings with the set of relevant belief statements using Ward’s method, with  
374 squared Euclidean distance as the measure of dissimilarity [32]. Note that, for all belief,  
375 involvement and evaluative attitudinal statements, respondents were instructed to indicate  
376 their agreement with a statement using a five-point rating scale, from strongly disagree (1) to  
377 strongly agree (5). Statistical analyses were conducted using the ‘cluster’ and ‘regression’  
378 commands in SPSS [33].

379



## 380 **Results**

### 381 **General**

382 As shown in Table 1, all of the involvement and attitudinal scales with respect to eliminating  
383 Covid-19, wearing face masks, self-isolating when unwell and getting tested for Covid-19  
384 exhibited satisfactory reliabilities [34]. Respondents' involvement with the policy outcome  
385 (eliminating Covid-19) and wearing face masks, self-isolating when unwell, and getting  
386 tested for Covid-19 (the policy measures) are summarised in Tables 2, 3 and 4, respectively.  
387 Most respondents exhibited moderate-to-high involvement with eliminating Covid-19 from  
388 New Zealand and with the three policy measures (see [35] for more detail). However, a  
389 substantial minority of respondents exhibited low-to-mild involvement with wearing face  
390 masks and getting tested for Covid-19. This result suggests a minority of Auckland residents  
391 may inadvertently fail to comply with government measures intended to prevent the spread of  
392 Covid-19 in the community.

393

394 Most respondents exhibited a strongly favourable attitude, as measured by the ipsative  
395 attitude scale, towards mask wearing, self-isolating and getting tested. These results suggest a  
396 small minority of Auckland residents would deliberately choose not to comply with  
397 government measures intended to prevent the spread of Covid-19 in the community. These  
398 results and their implications for government policy are discussed in detail by Kaine [35].

399

400

401

402 **Table 1. Reliability of involvement and attitude scales**

403

|                                              | Reliability <sup>1</sup> |
|----------------------------------------------|--------------------------|
| Involvement with eliminating Covid-19        | 0.847                    |
| Involvement with wearing face masks          | 0.852                    |
| Attitude towards wearing face masks          | 0.854                    |
| Involvement with self-isolating when unwell  | 0.707                    |
| Attitude towards self-isolating when unwell  | 0.795                    |
| Involvement with getting tested for Covid-19 | 0.821                    |
| Attitude towards getting tested for Covid-19 | 0.849                    |

404

405 Notes: <sup>1</sup> Values are Cronbach's alpha [34].

406

407

408 **Table 2. I<sub>3</sub> mapping for wearing face masks**

| Quadrant   | Favourable attitude | Unsure | Unfavourable attitude | Total |
|------------|---------------------|--------|-----------------------|-------|
| Quadrant 1 | 3                   | 4      | 2                     | 9     |
| Quadrant 2 | 7                   | 9      | -                     | 16    |
| Quadrant 3 | 59                  | 11     | 3                     | 73    |
| Quadrant 4 | 1                   | -      | -                     | 2     |
| Total      | 70                  | 24     | 5                     | 100   |

409

410 Notes: Values are percentages of the sample.

411

412

413

414 **Table 3. I<sub>3</sub> mapping for self-isolating**

| Quadrant   | Favourable attitude | Unsure | Unfavourable attitude | Total |
|------------|---------------------|--------|-----------------------|-------|
| Quadrant 1 | 1                   | 1      | -                     | 2     |
| Quadrant 2 | 5                   | 1      | 1                     | 7     |
| Quadrant 3 | 74                  | 6      | 5                     | 85    |
| Quadrant 4 | 4                   | 1      | 1                     | 6     |
| Total      | 84                  | 9      | 7                     | 100   |

415

416 Notes: Values are percentages of the sample.

417

418 **Table 4. I<sub>3</sub> mapping for testing**

| Quadrant   | Favourable attitude | Unsure | Unfavourable attitude | Total |
|------------|---------------------|--------|-----------------------|-------|
| Quadrant 1 | 3                   | 4      | -                     | 7     |
| Quadrant 2 | 14                  | 6      | 1                     | 21    |
| Quadrant 3 | 59                  | 9      | 2                     | 70    |
| Quadrant 4 | 1                   | 1      | -                     | 2     |
| Total      | 77                  | 20     | 3                     |       |

419 Notes: Values are percentages of the sample.

420

421 The predominantly moderate-to-high involvement with, and favourable attitudes towards,  
422 measures (such as wearing face masks) to eliminate Covid-19 from New Zealand of most  
423 respondents is consistent with the high level of community endorsement of the New Zealand  
424 government's approach to managing Covid-19 [36].

425

## 426 **Belief segments**

427 Respondents' beliefs were investigated because they can provide insights to guide the design  
428 of policies that, by modifying the beliefs and attitudes that underly compliance, seek to  
429 influence compliance. Using respondent agreement ratings for the relevant set of belief  
430 statements, respondents were classified into belief segments with respect to the nature of  
431 Covid-19, and the advantages and disadvantages of eliminating Covid-19 (the policy  
432 outcome), wearing face masks, self-isolating when unwell, and testing (the policy measures).  
433 Respondents were classified into segments using Ward's method, with squared Euclidean  
434 distance as the measure of dissimilarity [32].

435

436 The number of segments was chosen based on the relative change in fusion coefficients, ease  
437 of interpreting the segments, and a desire to keep the number of segments as small as possible  
438 [32]. The segments, and their belief characteristics, are summarised below.

439

440 Beliefs about Covid-19, eliminating Covid-19, wearing masks, self-isolating when unwell  
441 and getting tested for Covid-19 were associated, to some extent, with demographic  
442 characteristics such as age, education, income, and ethnicity (see [35] for details).

443

444

## 445 **Belief segments for Covid-19**

446 Respondents were classified into five belief segments with respect to Covid-19 (Table 5).

447 Most respondents had beliefs that align with accepted scientific facts. These respondents  
448 were classified as ‘Covid-19 convinced’ (41%) and ‘Covid-19 moderates’ (25%), the  
449 difference between these two segments being the intensity of their beliefs. The ‘Covid-19  
450 safe healthy’ (9%) had beliefs that mostly align with accepted scientific facts, but these  
451 respondents believed Covid-19 only posed a danger to the elderly and people with health  
452 problems. A fourth segment, the ‘Covid-19 ambivalents’ (15%), consisted of respondents  
453 who were unsure about what to believe about Covid-19.

454

455 A small segment of respondents, the ‘Covid-19 sceptics’ (10%) believed, variously, that  
456 Covid-19 was a hoax, was no worse than the seasonal flu, and that fears about Covid-19 are  
457 exaggerated.

458

## 459 **Belief segments for eliminating Covid-19**

460 Respondents were classified into four belief segments with respect to eliminating Covid-19  
461 (Table 6). Most respondents had beliefs that align with seeking to eliminate Covid-19 from  
462 New Zealand. These respondents were classified as ‘elimination enthusiasts’ (23%) and  
463 ‘elimination moderates’ (40%), the difference between these two segments being the intensity  
464 of their beliefs. Another segment of respondents, the ‘vaccination hopefuls’ (27%), agreed  
465 with trying to eliminate Covid-19 but were less sure that Covid-19 could be kept out of New  
466 Zealand indefinitely. They believed we must live with Covid-19 until a vaccine is available.  
467 A fourth segment, the ‘elimination sceptics’ (10%), consisted of respondents who believed  
468 we cannot eliminate Covid-19 indefinitely and we should try to build herd immunity.

469 **Table 5.** Belief segments for Covid-19

| Statement                                                                | Covid-19 convinced (41%) | Covid-19 moderates (25%) | Covid-19 ambivalents (15%) | Covid-19 safe healthy (9%) | Covid-19 sceptics (10%) |
|--------------------------------------------------------------------------|--------------------------|--------------------------|----------------------------|----------------------------|-------------------------|
| Coughing and sneezing spreads Covid-19                                   | 4.74                     | 3.82 <sup>a</sup>        | 4.20 <sup>a,b</sup>        | 4.55 <sup>b</sup>          | 3.75 <sup>a,c,d</sup>   |
| Covid-19 spreads from surfaces touched by infected people                | 4.15                     | 3.78 <sup>a</sup>        | 3.97                       | 4.11                       | 3.57 <sup>a,c,d</sup>   |
| Covid-19 is only a danger to the elderly and people with health problems | 1.34                     | 1.8 <sup>a</sup>         | 2.91 <sup>a,b</sup>        | 4.29 <sup>a,b,c</sup>      | 3.97 <sup>a,b,c</sup>   |
| You are immune to re-infection once you have had Covid-19                | 1.97                     | 2.29 <sup>a</sup>        | 2.79 <sup>a,b</sup>        | 2.24 <sup>c</sup>          | 3.57 <sup>a,b,c,d</sup> |
| Children cannot catch Covid-19                                           | 1.13                     | 1.67 <sup>a</sup>        | 2.22 <sup>a,b</sup>        | 1.36 <sup>b,c</sup>        | 3.07 <sup>a,b,c,d</sup> |
| Children are perfectly safe from Covid-19                                | 1.25                     | 1.70 <sup>a</sup>        | 2.17 <sup>a,b</sup>        | 1.47 <sup>c</sup>          | 3.43 <sup>a,b,c,d</sup> |
| You cannot catch the virus from people without symptoms                  | 1.34                     | 1.80 <sup>a</sup>        | 2.27 <sup>a,b</sup>        | 1.53 <sup>c</sup>          | 3.58 <sup>a,b,c,d</sup> |
| Covid-19 is a hoax                                                       | 1.07                     | 1.55 <sup>a</sup>        | 2.14 <sup>a,b</sup>        | 1.31                       | 3.55 <sup>a,b,c,d</sup> |
| Fears about Covid-19 are exaggerated                                     | 1.55                     | 2.24 <sup>a</sup>        | 3.31 <sup>a,b</sup>        | 2.28 <sup>a,c</sup>        | 3.78 <sup>a,b,c,d</sup> |
| Covid-19 is no worse than the seasonal flu                               | 1.32                     | 2.23 <sup>a</sup>        | 3.33 <sup>a,b</sup>        | 1.71 <sup>a,b,c</sup>      | 3.65 <sup>a,b,d</sup>   |
| Covid-19 is man-made                                                     | 2.24                     | 2.57 <sup>a</sup>        | 3.08 <sup>a,b</sup>        | 2.62                       | 3.84 <sup>a,b,c,d</sup> |
| Covid-19 comes from bats                                                 | 2.97                     | 2.95                     | 2.74                       | 2.96                       | 3.48 <sup>a,b,c,d</sup> |

470 Notes: Values are mean agreement ratings. Ratings ranged from a minimum of 1 (strongly disagree) to a maximum of 5 (strongly agree).

471 Differences in mean agreement ratings between segments tested using Tukey's HSD [37], ( $p < 0.01$ )

472 <sup>a</sup> Mean differs from mean for the 'convinced' segment

473 <sup>b</sup> Mean differs from mean for the 'moderates' segment

474 <sup>c</sup> Mean differs from the mean for the 'ambivalents' segment

475 <sup>d</sup> Mean differs from the mean for the 'safe healthy' segment

476 Table 6. Belief segments for eliminating Covid-19

| Statement                                                                                   | Elimination enthusiasts (23%) | Elimination moderates (40%) | Vaccine hopefuls (27%) | Elimination sceptics (10%) |
|---------------------------------------------------------------------------------------------|-------------------------------|-----------------------------|------------------------|----------------------------|
| We need to eliminate Covid-19 to save lives                                                 | 4.63                          | 4.10 <sup>a</sup>           | 3.56 <sup>a, b</sup>   | 3.2 <sup>a, b, c</sup>     |
| We should just live with it until we have a vaccine                                         | 1.67                          | 2.64 <sup>a</sup>           | 3.61 <sup>a, b</sup>   | 4.3 <sup>a, b, c</sup>     |
| It would be better to let it spread and build herd immunity                                 | 1.38                          | 1.84 <sup>a</sup>           | 2.57 <sup>a, b</sup>   | 4.24 <sup>a, b, c</sup>    |
| There is no point trying to eliminate Covid-19 because it is a virus and will keep changing | 1.7                           | 2.56 <sup>a</sup>           | 3.3 <sup>a, b</sup>    | 4.38 <sup>a, b, c</sup>    |
| Covid-19 is everywhere in the world so there is no way we can keep it out                   | 1.75                          | 3.05 <sup>a</sup>           | 4.00 <sup>a, b</sup>   | 4.44 <sup>a, b, c</sup>    |

477 Notes: Values are mean agreement ratings. Ratings ranged from a minimum of 1 (strongly disagree) to a maximum of 5 (strongly agree).

478 Differences in mean agreement ratings between segments tested using Tukey's HSD test [37] ( $p < 0.01$ )

479 <sup>a</sup> Mean differs from mean for the 'enthusiasts' segment

480 <sup>b</sup> Mean differs from mean for the 'moderates' segment

481 <sup>c</sup> Mean differs from the mean for the 'hopefuls' segment

482

483 **Wearing face masks and mask belief segments**

484 Respondents were classified into four belief segments with respect to wearing face masks  
485 (Table 7). Most respondents believed that wearing face masks was effective in helping  
486 eliminate Covid-19 from New Zealand. These respondents were classified as ‘mask  
487 enthusiasts’ (45%) and ‘mask moderates’ (21%), the difference between these two segments  
488 being the intensity of their beliefs.

489

490 Another segment of respondents, the ‘mask ambivalents’ (27%), agreed masks could be  
491 effective but were less sure about the need to wear masks if you were young and healthy, and  
492 the usefulness of masks on their own, and doubted the effectiveness of masks that were  
493 home-made or available for purchase by the public. A fourth segment consisted of  
494 respondents, the ‘mask sceptics’ (7%), who were not convinced masks were effective. These  
495 respondents believed you were over-reacting if you wore a mask unless you were elderly or  
496 had a health problem. They also believed that masks were of limited usefulness on their own  
497 and doubted the quality of masks that were home-made or could be purchased by the public.

498



499 Table 7. Belief segments for wearing masks<sup>1</sup>

| Statement                                                                   | Mask enthusiasts<br>(45%) | Mask moderates<br>(21%) | Mask ambivalents<br>(27%) | Mask sceptics<br>(7%) |
|-----------------------------------------------------------------------------|---------------------------|-------------------------|---------------------------|-----------------------|
| Masks are effective                                                         | 4.48                      | 3.78 <sup>a</sup>       | 3.34 <sup>a,b</sup>       | 3.24 <sup>a,b</sup>   |
| Wearing masks should be compulsory                                          | 4.04                      | 3.53 <sup>a</sup>       | 2.8 <sup>a,b</sup>        | 2.90 <sup>a,b</sup>   |
| Wearing a mask sets a good example to others                                | 4.52                      | 4.09 <sup>a</sup>       | 3.41 <sup>a,b</sup>       | 3.34 <sup>a,b</sup>   |
| You should only have to wear a mask if you feel unwell                      | 1.5                       | 1.96 <sup>a</sup>       | 3.39 <sup>a,b</sup>       | 4.24 <sup>a,b,c</sup> |
| You should only have to wear a mask if you are old or have a health problem | 1.5                       | 1.78 <sup>a</sup>       | 3.05 <sup>a,b</sup>       | 4.06 <sup>a,b,c</sup> |
| People who wear masks are over-reacting                                     | 1.39                      | 1.99 <sup>a</sup>       | 2.85 <sup>a,b</sup>       | 4.28 <sup>a,b,c</sup> |
| Masks are not practical                                                     | 1.53                      | 2.22 <sup>a</sup>       | 3.10 <sup>a,b</sup>       | 4.26 <sup>a,b,c</sup> |
| Home-made masks are a waste of time and effort                              | 1.77                      | 2.50 <sup>a</sup>       | 2.96 <sup>a,b</sup>       | 4.56 <sup>a,b,c</sup> |
| Masks are just too uncomfortable                                            | 2.18                      | 2.99 <sup>a</sup>       | 3.41 <sup>a,b</sup>       | 4.14 <sup>a,b,c</sup> |
| Masks we can buy are not worth bothering with                               | 1.93                      | 2.53 <sup>a</sup>       | 3.13 <sup>a,b</sup>       | 4.38 <sup>a,b,c</sup> |
| Masks are too difficult if you wear glasses                                 | 2.36                      | 3.35 <sup>a</sup>       | 3.49 <sup>a</sup>         | 4.16 <sup>a,b,c</sup> |
| Masks are not much help without gloves                                      | 2.02                      | 2.66 <sup>a</sup>       | 3.10 <sup>a,b</sup>       | 3.70 <sup>a,b,c</sup> |
| Masks on their own are not much help                                        | 2.13                      | 3.13 <sup>a</sup>       | 3.28 <sup>a</sup>         | 4.24 <sup>a,b,c</sup> |
| Masks are not much help because they are not worn properly                  | 2.43                      | 2.98 <sup>a</sup>       | 3.49 <sup>a,b</sup>       | 4.42 <sup>a,b,c</sup> |

500 Notes: Values are mean agreement ratings. Ratings ranged from a minimum of 1 (strongly disagree) to a maximum of 5 (strongly agree).

501 Differences in mean agreement ratings between segments tested using Tukey's HSD test [37] ( $p < 0.01$ )

502 <sup>a</sup> Mean differs from mean for the 'enthusiasts' segment

503 <sup>b</sup> Mean differs from mean for the 'moderates' segment

504 <sup>c</sup> Mean differs from the mean for the 'ambivalents' segment

## 505 **Self-isolating when unwell and self-isolation belief segments**

506 Respondents were classified into three belief segments with respect to self-isolating (Table  
507 8). Most respondents believed that self-isolating, if you felt unwell or had any of the  
508 symptoms associated with Covid-19, was effective in helping eliminate Covid-19 from New  
509 Zealand. These respondents were classified as ‘self-isolation enthusiasts’ (60%). Another  
510 large group of respondents, the ‘self-isolation ambivalents’ (29%), also believed that self-  
511 isolating was effective in helping eliminate Covid-19 but were unsure about the practicalities  
512 of it.

513

514 A third, smaller, segment consisted of the ‘self-isolation doubtfuls’ (11%), who believed self-  
515 isolating was effective in preventing the spread of Covid-19 but did not believe it was  
516 practical and would most likely be a waste of their time. These respondents believed that they  
517 could not afford the time off work to self-isolate, and you should only have to self-isolate if  
518 you were old, already had a health problem, or had all the right symptoms. They also  
519 believed staying at home if you were unwell was not much help if you didn’t get tested.

520

521 Table 8. Belief segments for self-isolating

| Statement                                                                            | Isolation enthusiasts<br>(60%) | Isolation ambivalents<br>(29%) | Isolation doubtfuls<br>(11%) |
|--------------------------------------------------------------------------------------|--------------------------------|--------------------------------|------------------------------|
| Staying at home if you are unwell is effective in preventing the spread of Covid-19  | 4.40                           | 3.91 <sup>a</sup>              | 3.95 <sup>a</sup>            |
| Staying at home if you feel unwell is just not practical                             | 1.78                           | 2.56 <sup>a</sup>              | 3.82 <sup>a, b</sup>         |
| I think staying at home if you feel unwell would be depressing                       | 2.19                           | 2.92 <sup>a</sup>              | 3.96 <sup>a, b</sup>         |
| I couldn't afford the time off work to stay home if I was unwell                     | 2.20                           | 3.00 <sup>a</sup>              | 4.10 <sup>a, b</sup>         |
| You should only stay home if you have all the right symptoms                         | 2.16                           | 3.18 <sup>a</sup>              | 4.04 <sup>a, b</sup>         |
| You should only have to stay at home if you are old or already have a health problem | 1.52                           | 2.71 <sup>a</sup>              | 3.92 <sup>a, b</sup>         |
| Staying home if you are unwell is not much help if you don't get tested              | 2.63                           | 3.14 <sup>a</sup>              | 4.01 <sup>a, b</sup>         |
| Staying at home if you feel unwell is a waste of time and effort                     | 1.42                           | 2.25 <sup>a</sup>              | 3.88 <sup>a, b</sup>         |

522

523 Notes: Values are mean agreement ratings. Ratings ranged from a minimum of 1 (strongly disagree) to a maximum of 5 (strongly agree).

524 Differences in mean agreement ratings between segments tested using Tukey's HSD test [37] ( $p < 0.01$ )

525 <sup>a</sup> Mean differs from mean for the 'enthusiasts' segment

526 <sup>b</sup> Mean differs from mean for the 'ambivalents' segment

527

## 528 **Covid-19 testing and testing belief segments**

529 Respondents were classified into four belief segments with respect to testing for Covid-19  
530 (Table 9). Nearly all respondents believed that testing for Covid-19 was effective in helping  
531 eliminate Covid-19 from New Zealand. However, respondents differed in their beliefs about  
532 the efficacy of tests and who should be tested.

533

534 Most respondents believed that testing was practical and reliable, and should include the  
535 healthy as well as the elderly, people with health problems or people with Covid-19  
536 symptoms. These respondents were classified as ‘testing enthusiasts’ (12%) and ‘testing  
537 moderates’ (59%), the difference between these two segments being the intensity of their  
538 beliefs.

539

540 Another segment of respondents, the ‘testing selectives’ (12%), were like the ‘testing  
541 enthusiasts’ in believing that testing was practical and reliable, but they believed testing could  
542 be limited to sick people. A fourth segment, the ‘testing doubters’ (18%), consisted of  
543 respondents who believed testing was effective in preventing the spread of Covid-19, but did  
544 not believe it was practical or reliable, and that testing should be limited to the elderly, people  
545 with health problems and people with Covid-19 symptoms.

546

547 Compared to the other testing segments, a relatively high proportion of ‘testing enthusiasts’  
548 indicated they had been tested for Covid-19. There were no differences among the segments  
549 in the proportion of respondents who had been tested in each segment and who had felt  
550 unwell when they were tested. Assuming the probability of exposure to Covid-19 and the  
551 probability of ‘feeling unwell’ is similar across the segments, one explanation for this result

552

553 Table 9. Belief segments for Covid-19 testing

| Statement                                                          | Testing enthusiasts<br>(12%) | Testing moderates<br>(59%) | Testing selectives<br>(12%) | Testing doubters<br>(18%) |
|--------------------------------------------------------------------|------------------------------|----------------------------|-----------------------------|---------------------------|
| Testing people is effective in preventing the spread of Covid-19   | 4.77                         | 3.95 <sup>a</sup>          | 4.86 <sup>b</sup>           | 3.40 <sup>a, b, c</sup>   |
| You should only get tested if you have the right symptoms          | 1.56                         | 3.17 <sup>a</sup>          | 2.29 <sup>b</sup>           | 3.57 <sup>a, b, c</sup>   |
| Testing is not much help if you only test sick people              | 4.22                         | 3.16 <sup>a</sup>          | 1.59 <sup>a, b</sup>        | 3.45 <sup>a, c</sup>      |
| You should only get tested if you are old or have a health problem | 1.15                         | 2.11 <sup>a</sup>          | 1.13 <sup>b</sup>           | 3.37 <sup>a, b, c</sup>   |
| The tests for Covid-19 are too unreliable                          | 1.51                         | 2.25 <sup>a</sup>          | 1.34 <sup>b</sup>           | 3.53 <sup>a, b, c</sup>   |
| Testing is painful and uncomfortable                               | 2.86                         | 3.06                       | 2.43 <sup>b</sup>           | 3.38 <sup>a, c</sup>      |
| Testing people is just not practical                               | 1.17                         | 2.16 <sup>a</sup>          | 1.41 <sup>b</sup>           | 3.51 <sup>a, b, c</sup>   |
| Testing takes so long it's not worth bothering with                | 1.10                         | 2.04 <sup>a</sup>          | 1.29 <sup>b</sup>           | 3.48 <sup>a, b, c</sup>   |
| Getting tested is a waste of time and effort                       | 1.05                         | 1.84 <sup>a</sup>          | 1.10 <sup>b</sup>           | 3.32 <sup>a, b, c</sup>   |

554 Notes: Values are mean agreement ratings. Ratings ranged from a minimum of 1 (strongly disagree) to a maximum of 5 (strongly agree).

555 Differences in mean agreement ratings between segments tested using Tukey's HSD test [37] ( $p < 0.01$ )

556 <sup>a</sup> Mean differs from mean for the 'enthusiasts' segment

557 <sup>b</sup> Mean differs from mean for the 'moderates' segment

558 <sup>c</sup> Mean differs from the mean for the 'selectives' segment

559

560 is that respondents in the ‘testing enthusiasts’ segment are more likely than those in other  
561 segments to seek testing, whether they are well or unwell.

562

563 While a relatively high proportion of Māori and Pacific Islander respondents in the sample  
564 had been tested for Covid-19, a relatively low proportion of respondents from other ethnic  
565 groups, including European New Zealanders, had been tested. A relatively high proportion of  
566 respondents who were European New Zealanders who had been tested were unwell at the  
567 time of testing, while a relatively low proportion of respondents who were Māori or Pacific  
568 Islanders were unwell when tested.

569

570 There were no other socio-demographic differences between respondents in the sample who  
571 had been tested for Covid-19 and those who had not [35].

572

### 573 **Predicting compliance**

574 The purpose of this analysis was to quantify the effect of beliefs, attitudes, and involvement  
575 on respondents’ propensity to comply with wearing face masks in public, self-isolating and  
576 being tested for Covid-19. In other words, we wanted to estimate, separately, the influence of  
577 involvement (as a measure of the strength of individuals’ motivation) on compliance and the  
578 influence of beliefs and attitudes in the context of eliminating Covid-19 from New Zealand  
579 by wearing masks, self-isolating when unwell and being tested.

580

581 We hypothesised that the propensity to wear face masks, self-isolate when unwell and get  
582 tested for Covid-19 was a function of involvement and attitude, as outlined by Kaine et al.  
583 [6]. We also hypothesised that the marginal effect of an increase in involvement with the  
584 outcome (eliminating Covid-19) would decrease with higher levels of involvement with the

585 measure (e.g. wearing face masks). The same would apply with respect to the marginal effect  
586 of an increase in involvement with the measure (e.g. wearing face masks), which would  
587 decrease with higher levels of involvement with the outcome (eliminating Covid-19). In  
588 addition, we hypothesised that attitudes towards mask wearing, self-isolating when unwell  
589 and testing were a function of beliefs about Covid-19, eliminating Covid-19, mask wearing,  
590 self-isolating and testing.

591

592 To summarise, two sets of regressions were estimated. One set had propensity to comply as  
593 the dependent variable (e.g. wear face masks), with involvement with the outcome  
594 (eliminating Covid-19), involvement with the measure (e.g. wearing masks), the interaction  
595 between the involvement with the outcome and the measure, and attitudes towards the  
596 measure as the explanatory variables.

597

598 The second set had attitudes towards the measures (wearing face masks, self-isolating and  
599 testing) as the dependent variables, with beliefs about Covid-19, eliminating Covid-19, and  
600 beliefs about the measures (mask wearing, self-isolating when unwell and testing  
601 respectively) as the explanatory variables.

602

603 Respondents' propensity to wear face masks was obtained by asking them if they had worn a  
604 face mask when out in public the previous week and if they had to go out to work the  
605 previous week. Respondents answered both questions using a five-point scale ranging from  
606 'always' to 'never'. Their propensity to self-isolate was obtained by asking them, 'Thinking  
607 about the next few days, would you stay home if you were unwell or had any of the following  
608 symptoms: a dry cough, fever, loss of sense of smell, loss of sense of taste, shortness of  
609 breath or difficulty breathing?'. We also asked, 'If you were advised to do so by a health care

610 professional or public health authority, would you self-isolate for 14 days?'. Both questions  
611 were answered using a five-point scale ranging from 'definitely' to 'definitely not'.

612

613 Regarding testing, the propensity to be tested will depend on their perceptions of the risk of  
614 exposure to Covid-19 and whether they had experienced symptoms associated with Covid-19,  
615 as well as their involvement with, and attitudes towards, testing. We had data indicating  
616 whether respondents had been tested for Covid-19 and, if they had, whether they were feeling  
617 unwell at the time. However, we did not have data indicating whether any respondents had  
618 felt unwell but had not sought Covid-19 testing. Nor did we have data on respondent's  
619 perceptions of exposure to Covid-19 such as their proximity to sources of outbreaks.  
620 Consequently we were unable to estimate satisfactory regressions for being tested.

621

622 Dummy variables were created representing respondents' membership of belief segments  
623 with respect to Covid-19, eliminating Covid-19, mask wearing, self-isolating when unwell,  
624 and being tested. In each instance, the 'Covid-19 convinced' or 'enthusiast' segments were  
625 treated as the benchmark. Attitudes towards the policy measures were included using the  
626 evaluative scale described earlier.

627

628 The explanatory power of the regressions, and the resulting parameter estimates, are reported  
629 in Tables 10 and 11. The compliance regressions were statistically significant and, for cross-  
630 sectional data, a substantial proportion of the variance in respondents' compliance was  
631 explained by their involvement and attitudes (apart from the regression for staying at home if  
632 feeling unwell).

633



634 The attitudinal regressions were statistically significant and, for cross-sectional data, a  
635 substantial proportion of the variance in the attitudes of respondents was explained by their  
636 beliefs.

637

638 Willingness to wear face masks in public and at work was strongly and positively influenced  
639 by involvement with eliminating Covid-19 as well as involvement with, and attitudes  
640 towards, wearing face masks. Willingness to self-isolate when unwell was also strongly and  
641 positively influenced by involvement with eliminating Covid-19 as well as involvement with,  
642 and attitudes towards, self-isolating.

643 Table 10. Parameter estimates for propensity to wear face masks and self-isolate

|                                       | Wear face mask in public<br>(n=674) | Wear face mask at work<br>(n=477) | Stay home if unwell<br>(n=655) | Stay home if instructed<br>(n=655) |
|---------------------------------------|-------------------------------------|-----------------------------------|--------------------------------|------------------------------------|
| Involvement with eliminating Covid-19 | 0.629<br>(p=008)                    | 0.411<br>(p=0.318)                | 1.432<br>(p<0.001)             | 0.834<br>(p<0.001)                 |
| Involvement with wearing face masks   | 1.657<br>(p<0.001)                  | 1.680<br>(p<0.001)                |                                |                                    |
| Involvement with self-isolating       |                                     |                                   | 1.571<br>(p<0.001)             | 0.733<br>(p=0.005)                 |
| Involvement with testing              |                                     |                                   |                                |                                    |
| Attitude towards face masks           | 0.731<br>(p<0.001)                  | 0.602<br>(p<0.001)                |                                |                                    |
| Attitude towards self-isolating       |                                     |                                   | 0.419<br>(p<0.001)             | 0.397<br>(p<0.001)                 |
| Attitude towards testing              |                                     |                                   |                                |                                    |
| Feeling unwell when tested            |                                     |                                   |                                |                                    |
| Involvement interaction <sup>1</sup>  | -0.278<br>(p<0.001)                 | -0.226<br>(p=0.046)               | -0.374<br>(p<0.001)            | -0.189<br>(p=0.003)                |
| Intercept                             | -3.443<br>(p<0.001)                 | -3.172<br>(p=0.031)               | -3.249<br>(p=0.013)            | -0.218<br>(p=0.812)                |
| Adjusted R <sup>2</sup>               | 0.45                                | 0.27                              | 0.15                           | 0.21                               |
| F-Test significance                   | <0.01                               | <0.01                             | <0.01                          | <0.01                              |

644 Notes: <sup>1</sup>Interaction between involvement with Covid-19 and involvement either with wearing masks or with self-isolating.

645 **Table 11. Parameter estimates for attitude towards wearing face masks, self-isolating and seeking**  
 646 **testing**

|                               | Attitude towards face<br>masks<br>(n=682) | Attitude towards self-<br>isolating<br>(n=655) | Attitude towards<br>testing<br>(n=662) |
|-------------------------------|-------------------------------------------|------------------------------------------------|----------------------------------------|
| Covid-19 moderate             | -0.194<br>(p<0.001)                       | -0.111<br>(p=0.035)                            | -0.206<br>(P<0.001)                    |
| Covid-19 ambivalent           | -0.307<br>(p<0.001)                       | -0.153<br>(p=0.028)                            | -0.308<br>(p<0.001)                    |
| Covid-19 healthy              | -0.171<br>(p=0.031)                       | -0.064<br>(p=0.452)                            | -0.034<br>(p=0.655)                    |
| Covid-19 sceptic              | -0.328<br>(p<0.001)                       | -0.378<br>(p<0.001)                            | -0.309<br>(P<0.001)                    |
| Elimination moderate          | 0.049<br>(p=0.389)                        | -0.035<br>(p=0.535)                            | -0.028<br>(p=0.603)                    |
| Elimination hopeful           | -0.079<br>(p=0.228)                       | -0.049<br>(p=0.427)                            | -0.053<br>(p=0.378)                    |
| Elimination sceptic           | 0.059<br>(p=0.539)                        | 0.101<br>(p=0.258)                             | 0.100<br>(p=0.255)                     |
| Mask moderate                 | -0.387<br>(p<0.001)                       |                                                |                                        |
| Mask ambivalent               | -1.133<br>(P<0.001)                       |                                                |                                        |
| Mask sceptic                  | -1.532<br>(p<0.001)                       |                                                |                                        |
| Isolation ambivalent          |                                           | -0.461<br>(p<0.001)                            |                                        |
| Isolation doubter             |                                           | -0.845<br>(p<0.001)                            |                                        |
| Test selectives               |                                           |                                                | 0.000<br>(p=0.992)                     |
| Test moderates                |                                           |                                                | -0.556<br>(p<0.001)                    |
| Test doubters                 |                                           |                                                | -1.262<br>(p<0.001)                    |
| Intercept                     | 4.715<br>(p<0.001)                        | 4.727<br>(p<0.001)                             | 4.849<br>(p<0.001)                     |
| <b>Adjusted R<sup>2</sup></b> | <b>0.55</b>                               | <b>0.30</b>                                    | <b>0.45</b>                            |
| <b>F-Test significance</b>    | <b>&lt;0.01</b>                           | <b>&lt;0.01</b>                                | <b>&lt;0.01</b>                        |

647

648 As hypothesised, the marginal impact of an increase in involvement with wearing face masks  
649 or self-isolating when unwell decreased with higher levels of involvement with eliminating  
650 Covid-19 (and vice versa) and illustrated in S3 with respect to wearing face masks. Overall,  
651 the results reported in Table 10 support the idea that involvement and attitudes have  
652 differential effects on compliance.

653

654 Respondents' attitudes towards wearing face masks were influenced by their beliefs about  
655 Covid-19 and about the effectiveness of wearing face masks (see Table 11). Similarly, their  
656 attitudes towards self-isolating when unwell were influenced by their beliefs about Covid-19  
657 together with their beliefs about the effectiveness of self-isolating. Lastly, their attitudes  
658 towards testing were influenced by their beliefs about Covid-19 together with their beliefs  
659 about the effectiveness of testing. Respondents' beliefs about the effectiveness of eliminating  
660 Covid-19 as a strategy did not appear to have a significant influence on attitudes to any of the  
661 measures. In all instances the signs on the estimated parameters were consistent with  
662 expectations with attitudes becoming more and more unfavourable as respondents' beliefs  
663 shifted towards scepticism as has been found in other studies [38, 39].

664

## 665 **Discussion**

666 Kaine et al. [6] proposed that the propensity of individuals to change their behaviour and  
667 comply with policy measure depends on the intensity of their involvement with the policy  
668 outcome and policy measure, as well as their attitude towards the policy measure. The results  
669 presented here largely support that proposition: they clearly indicate that involvement (how  
670 much an individual cares about a subject) influences the propensity to comply with measures  
671 to prevent the spread of Covid-19 in addition to their attitude towards those measures. The

672 prosaic but important implication is that people may hold similar opinions or attitudes  
673 towards a protocol such as wearing face masks in public, but their propensity to do so may  
674 vary markedly depending on how involved they are with – how much they care about –  
675 preventing the spread of Covid-19 and wearing face masks.

676

677 Of course, the influence of involvement becomes unimportant in explaining differences in  
678 compliance if everyone has a similar level of involvement, as appears to be the case with self-  
679 isolating when unwell. In these circumstances, individual differences in attitudes and  
680 constraints on behaviour, such as the capacity to absorb salary losses, are the determinants of  
681 compliance.

682

683 Our findings have three important implications for promoting community compliance with  
684 measures intended to prevent the spread of Covid-19 in particular, and the design of policy  
685 measures generally. The first is that people may, inadvertently, fail to comply with a measure  
686 even though they may have favourable attitudes towards the policy outcome, simply because  
687 they are not paying attention. In circumstances where involvement is low, compliance (or  
688 non-compliance) is not a matter of deliberate choice. Consequently, authorities must consider  
689 carefully imposing blanket penalties for non-compliance because they run the risk of  
690 alienating people who would otherwise do the 'right thing'.

691

692 In the context of measures to prevent the spread of Covid-19, this translates into ensuring that  
693 compliance requires as little effort and thought as practical, and is as stress-free as possible  
694 [40]; for example, by supplying face masks for free on public transport and other high-risk  
695 locations such as supermarkets [41], by ensuring testing is as convenient as possible, by  
696 minimising as far as practical the time spent travelling to testing centres and the time spent

697 queuing for tests, and by offering limited compensation for those who are required to self-  
698 isolate because they test positive.

699

700 In these circumstances, where involvement is high, compliance (or non-compliance) is most  
701 likely to be a deliberate choice, the choice depending on one's attitude towards the wearing of  
702 face masks, self-isolating when unwell, and testing. If attitudes are strongly unfavourable,  
703 then severe penalties or substantial inducements may be required to secure compliance, or  
704 compliance could be imposed (for example, compelling employers to report staff with Covid-  
705 19 symptoms to health authorities).

706

707 Clearly, differences in the level of involvement people have with the outcome of eliminating  
708 Covid-19 and the measures for preventing the spread of Covid-19 create an additional  
709 complication for authorities responsible for implementing the strategy. Tactics to promote  
710 compliance among those with low involvement will not influence the highly involved who  
711 are non-compliant, unless the latter can be rapidly and easily distinguished from the former.

712

713 The second implication is that people who have low involvement with the policy outcome  
714 and the policy measures may miss important promotional messages simply because they are  
715 not paying attention. In circumstances where involvement with a subject is low, sensitivity to  
716 promotional messages about the subject is low. Messages are not necessarily deliberately  
717 ignored; they simply fail to catch the attention of those with low involvement (they are not  
718 noticed).

719

720 In the context of Covid-19 measures, this means that people with low-to-mild involvement  
721 with eliminating Covid-19 and with the measures for preventing the spread of Covid-19 may

722 fail to notice or properly process promotional messages about Covid-19 and the measures.

723 They may, for example, be entirely unaware of lockdown rules (or even what level of

724 lockdown is in play). This increases the risk that people with low involvement may

725 inadvertently be non-compliant, especially if changes are made to lockdown rules, or new

726 lockdown levels are introduced.

727

728 Relatedly, Gray et al., [42] found, as we did, that people's willingness to wear face masks

729 depended on their beliefs about the effectiveness of face masks in protecting them from

730 infection. Consequently, they recommended developing and promoting to the public clear

731 guidelines on wearing face masks and increasing promotional efforts dispelling myths about

732 the efficacy of masks [42]. Such promotional efforts are unlikely to meet with success

733 among people who have low-to-mild involvement with Covid-19 and with wearing face

734 masks as they are unlikely to pay proper attention to such promotional messages unless they

735 are designed in such a way as to capture their attention.

736

737 The attention of people with low involvement in a subject can be captured if messages about

738 the subject can be linked to another matter that is involving for them. This requires

739 identifying, for those not interested in Covid-19, themes that are involving for them, and that

740 can be meaningfully linked to containing the spread of Covid-19. The sport metaphor '[We

741 are] a team of five million', employed in community messaging about Covid-19 by the New

742 Zealand government, is one example, though this metaphor may not be universally appealing.

743 Other examples may be framing messages about following Covid-19 measures in the context

744 of protecting families and jobs [36].

745

746 The third implication concerns the intrinsic malleability of the beliefs and attitudes of people  
747 who have low involvement with a subject. Such people devote little time and effort to  
748 gathering information about the subject, evaluating that information, and forming beliefs  
749 about and attitudes towards the subject. This means their beliefs and attitudes may be  
750 unstable and can change rapidly.

751

752 With respect to preventing the spread of Covid-19, this raises the possibility that, on the one  
753 hand, the distribution of misinformation through social media may provoke changes in the  
754 beliefs and attitudes of people with low involvement in Covid-19 that are undesirable because  
755 they undermine compliance with Covid-19 measures [39, 43]. Such misinformation may  
756 provide a self-serving rationale for failing to comply with measures that require an  
757 investment of time and effort. On the other hand, people with low involvement are unlikely to  
758 strongly endorse misinformation (unless it is framed within a context they find highly  
759 involving) and so are unlikely to be provoked into engaging in non-compliant behaviours that  
760 require an investment of time and effort (such as attending protest rallies).

761

762 These considerations suggest that government authorities must be careful to discriminate  
763 between audiences on social media in terms of involvement when it comes to investing  
764 resources in combating misinformation about Covid-19. Presumably, those with low  
765 involvement in eliminating Covid-19 will exhibit a lower intensity and pattern of engagement  
766 with misinformation on social media than those with high involvement.

767

768 The willingness of people to adopt behaviours to prevent the spread of Covid-19 such as  
769 wearing face masks, self-isolating and getting tested for Covid-19 has been the subject of  
770 numerous studies [41, 44, 45, 46, 47, 48, 49, 50]. These studies have shown that willingness



771 to adopt these behaviours does depend on peoples' attitudes towards them, which in turn  
772 depend on their beliefs about the behaviours. Consequently, many of these studies  
773 recommend that the adoption of preventive behaviours can be improved through promotional  
774 efforts intended to change beliefs and attitudes. Our results have two important implications  
775 for such recommendations.

776

777 First, while it is undoubtedly true that changing attitudes can change behaviour, promotional  
778 efforts intended to change beliefs and attitudes about preventative behaviours are unlikely to  
779 meet with complete success unless most people have moderate-to-high involvement both  
780 with preventing the spread of Covid-19 and with preventative behaviours.

781

782 Second, the greater the proportion of people with low-to-mild involvement with preventing  
783 the spread of Covid-19 and with preventative behaviours, the more likely efforts to improve  
784 the ease and convenience of adopting preventative behaviours will be more effective in  
785 changing behaviour compared to promotional efforts aimed at changing peoples' beliefs and  
786 attitudes. See West et al., [51] for a discussion about the range of interventions that might  
787 accompany promotion.

788

789 Our findings are subject to a several qualifications including the following. First, beliefs,  
790 attitudes, and behaviours regarding preventing the spread of Covid-19, the wearing of face  
791 masks, self-isolating when unwell and getting tested for Covid-19 may have changed over  
792 time as the pandemic has progressed. Second, as the survey sample was drawn from an  
793 internet panel there may be selection bias. While the nature and severity of this bias in  
794 relation to the beliefs, attitudes, and involvement we investigated is unknown, it does seem

795 reasonable to suppose, *ceteris paribus*, that people with low-to-mild involvement may be  
796 under-represented in the sample.

797

798 Third, as the scales measuring wearing of face masks, willingness to self-isolate and being  
799 tested for Covid-19 were self-reported, our measurements of these behaviours may have been  
800 affected by social desirability bias [30]. As noted above, while Daoust et al. [31] found that  
801 social desirability bias appeared to be consistent across gender, age, and education categories,  
802 the potential for bias in self-reporting of socially desirable behaviours (or opinions) in the  
803 context of the categories in the I<sub>3</sub> Framework is less clear. There may be correlation between  
804 quadrant membership and social desirability bias.

805

806 On one hand, those with low involvement in, say, eliminating Covid-19 and wearing face  
807 masks might be expected to exhibit (downward) social desirability bias in self-reporting  
808 behaviours because they are less motivated to actually engage in the behaviour. However,  
809 their lack of interest in eliminating Covid-19 and wearing face masks means they may be  
810 quite insensitive to the opinions of others about the behaviour, and so be less susceptible to  
811 social desirability bias.

812

813 On the other hand, those with high involvement in eliminating Covid-19 and wearing face  
814 masks might be expected to exhibit (upward) social desirability bias in self-reporting  
815 behaviours because they are motivated to actually engage in the behaviour. Their very  
816 interest in eliminating Covid-19 and wearing face masks may mean they are quite sensitive to  
817 the opinions of others about the behaviour (especially if expressing self-identity is an  
818 important source of involvement) and thus be more susceptible to social desirability bias. On  
819 this argument, self-reporting of socially desirable behaviours like wearing face masks might

820 mean the actual association between involvement and engagement in such behaviours could  
821 be over-estimated. As noted earlier, our expectation is that the design and administration of  
822 the survey are such as to reduce the likely magnitude of social-desirability bias effects  
823 compared to previous findings. Clearly, the interaction between I<sub>3</sub> quadrant membership and  
824 social desirability bias is an area requiring further study.

825

826 Fourth, the adoption of behaviours such as the wearing of face masks has been associated  
827 with a range of variables including perceptions of the perceived risk of infection, the local  
828 incidence rate of COVID-19 and feelings of stress in relation to COVID-19 (see [40] for  
829 example). We did not include these variables in our analysis, and, while the correlation  
830 between these variables and involvement is unknown, it is likely to be positive.

831

## 832 **Conclusions**

833 Governments around the world are seeking to slow the spread of Covid-19 by implementing  
834 measures that encourage, or mandate, changes in people's behaviour. These changes include  
835 the wearing of face masks, social distancing, and testing and self-isolating when unwell. The  
836 success of these measures depends on the commitment of individuals to change their  
837 behaviour accordingly. Understanding and predicting the motivation of individuals to change  
838 their behaviour is critical to assessing the likely effectiveness of these measures in slowing  
839 the spread of the virus.

840

841 Kaine et al. [6] hypothesised that the propensity of individuals to change their behaviour and  
842 comply with policy measures depends on the intensity of their involvement with, and their  
843 attitude towards, the measure. This is because cognitive effort is required to form a strongly

844 held attitude, and such effort is only invested when the matter at hand is sufficiently  
845 important to the individual. They also hypothesised that the propensity of individuals to  
846 comply with policy measures also depends on their involvement with the policy outcome the  
847 measure addresses. An implication of these hypotheses is that individuals with similar  
848 attitudes will display varying degrees of compliance with policy measures depending on the  
849 intensity of their involvement with the policy outcome and the policy measure.

850

851 We tested these hypotheses, and their implication, using compliance with measures to prevent  
852 the spread of Covid-19 in New Zealand. Broadly speaking the hypotheses and their  
853 implication are supported by the results. The finding that compliance depends on  
854 involvement (motivation) as well as attitude has important implications for the design of  
855 policy measures intended to promote compliance. This finding also has important  
856 implications for the design of promotional programmes to communicate information to the  
857 community about policy measures intended to promote compliance.

858

859 With respect to preventing the spread of Covid-19 in New Zealand, the results highlight the  
860 importance of distinguishing unintentional non-compliance with respect to wearing face  
861 masks, self-isolating when unwell, and testing from deliberate non-compliance, and tailoring  
862 enforcement strategies appropriately. The results also highlight the difficulty of  
863 communicating effectively through mass media with those who have low involvement with  
864 preventing the spread of Covid-19, and the importance of distinguishing between those with  
865 low and high involvement in considering the possible effects on compliance of the  
866 dissemination of misinformation about Covid-19 through social media.

867

## 868 **Acknowledgements**

869 We would sincerely like to thank the residents of Auckland who completed the questionnaire.

870 Thanks also to our two anonymous referees for their time, patience, constructive advice, and

871 suggestions and for bringing the potential implications of social desirability bias to our

872 attention.

873

## 874 **References**

- 875 1. Czeisler ME, Tynan MA, Howard ME, Honeycutt S, Fulmer EB, Kidder DP, et al, Public  
876 attitudes, behaviors, and beliefs related to COVID-19, stay-at-home orders,  
877 nonessential business closures, and public health guidance – United States, New York  
878 City, and Los Angeles, May 5-12, 2020. *Morbidity and Mortality Weekly Report*. 2020;  
879 69(24): 751-758. [doi.org/10.15585/mmwr.mm6924e1](https://doi.org/10.15585/mmwr.mm6924e1)
- 880 2. Hager E, Odetokun IA, Bolarinwa O, Zainab A, Okechukwu O, Al-Mustapha AI,  
881 Knowledge, attitude, and perceptions towards the 2019 Coronavirus Pandemic: A bi-  
882 national survey in Africa. *PLoS ONE*, 2020; 15(7): e0236918.  
883 [doi.org/10.1371/journal.pone.0236918](https://doi.org/10.1371/journal.pone.0236918)
- 884 3. Jarynowski A, Wójta-Kempa M, Płatek D, Czopek K, Attempt to understand public health  
885 relevant social dimensions of COVID-19 outbreak in Poland (5 April 2020). Available  
886 at SSRN: <https://ssrn.com/abstract=3570609>
- 887 4. Burby RJ, Paterson RG, Improving compliance with state environmental regulations. *J.*  
888 *Policy Anal. Manage.* 1993; 12: 753-772.
- 889 5. Daoust J.-F, 2020. Elderly people and responses to COVID-19 in 27 Countries. *PLoS ONE*  
890 15(7): e0235590. <https://doi.org/10.1371/journal.pone.0235590>

- 891 6. Kaine G, Murdoch H, Lourey R, Bewsell D, A framework for understanding individual  
892 response to regulation. *Food Policy* 2010; 35: 531–537.
- 893 7. Kim Y, Conceptualizing health campaign strategies through the level of involvement.  
894 *Corp. Commun. Int. J.* 2003; 8: 255-267.
- 895 8. Zaichkowsky JL, Measuring the involvement construct. *J. Consum. Res.* 1985; 12: 341-  
896 352.
- 897 9. Ajzen I, Fishbein M, Attitude-behaviour relations: A theoretical analysis and review of  
898 empirical research. *Psychol. Bull.* 1977; 84: 888-918.
- 899 10. Kassirjian HH, Low involvement: A second look, in: Monroe KB. (Ed.), *Advances in*  
900 *Consumer Research*. Association for Consumer Research, 1981; 31-34.
- 901 11. Murdoch H, Bewsell D, Lourey R, Kaine G, Understanding people's response to  
902 biosecurity regulation. *Decision Making in Uncertain Times*, 3rd National Conference  
903 on Risk Management. The New Zealand Society for Risk Management Inc, Auckland,  
904 2006.
- 905 12. Chaffee SH, Roser C, Involvement and the consistency of knowledge, attitudes, and  
906 behaviours. *Commun. Res.* 1986; 13: 373-399.
- 907 13. Petty RE, Cacioppo JT, The Effects of Involvement on Responses to Argument Quantity  
908 and Quality: Central and Peripheral Routes to Persuasion. *J. Pers. Soc. Psychol.* 1984;  
909 46: 69-81.
- 910 14. Thaler R.H, Sunstein CR, *Nudge: improving decisions about health, wealth, and*  
911 *happiness*. New Haven, CT: Yale University Press; 2008.
- 912 15. Gunningham N, Grabosky P, Sinclair D, *Smart regulation: Designing environmental*  
913 *policy*. Oxford University Press, New York; 1998.

- 914 16. Davies A, Kaine G, Lourey R, Understanding factors leading to non-compliance with  
915 effluent regulations by dairy farmers. Environment Waikato Technical Report 2007/37,  
916 Environment Waikato, Hamilton; 2007.
- 917 17. Carlough L, General deterrence of environmental violation: A peek into the mind of the  
918 regulated public. Oregon Department of Environmental Quality. 2003. Available at  
919 <http://www.deq.state.or.us/programs/enforcement> [accessed June 6 2008].
- 920 18. Kaine G, Tostovrsnik N, Landholders and the management of weeds: Blackberry and  
921 serrated tussock. Service Design Research Working Paper 03-11, Department of  
922 Primary Industries, Tatura, Victoria; 2011.
- 923 19. Lourey R, Kaine G, Davies A, Young J, Landholder responses to incentives for wild dog  
924 control. Service Design Research Working Paper 07-11. Department of Primary  
925 Industries, Tatura, Victoria; 2011.
- 926 20. Kaine G, An application of the I<sub>3</sub> framework to rat control in Hawke's Bay. Landcare  
927 Research Contract Report LC3646; 2019.
- 928 21. Kaine G, Kirk N, Kannemeyer R, Stronge D, Wiercinski B. Predicting people's  
929 motivation to engage in urban possum control. Conservation. 2021; 1: 196-215.  
930 <https://doi.org/10.3390/conservation1030016>.
- 931 22. Kaine G, Stronge D, An application of the I<sub>3</sub> framework to rat control in New Plymouth.  
932 Landcare Research Report LC3734; 2020.
- 933 23. Kaine G, Kannemeyer R, Stronge D, Using 1080 to control possums and rats: An  
934 application of the I<sub>3</sub> framework. Landcare Research Report LC3747; 2020.
- 935 24. New Zealand Government, History of the COVID-19 alert system; 2021.  
936 <https://covid19.govt.nz/alert-system/history-of-the-covid-19-alert-system/>
- 937 25. Travica B, Containment strategies for COVID-19 pandemic 2020; Available at SSRN:  
938 <https://ssrn.com/abstract=3604519> or <http://dx.doi.org/10.2139/ssrn.3604519>

- 939 26. Ministry of Health, 2021. [https://www.health.govt.nz/our-work/diseases-and-](https://www.health.govt.nz/our-work/diseases-and-conditions/covid-19-novel-coronavirus/covid-19-response-planning/covid-19-elimination-strategy-aotearoa-new-zealand)  
940 [conditions/covid-19-novel-coronavirus/covid-19-response-planning/covid-19-](https://www.health.govt.nz/our-work/diseases-and-conditions/covid-19-novel-coronavirus/covid-19-response-planning/covid-19-elimination-strategy-aotearoa-new-zealand)  
941 [elimination-strategy-aotearoa-new-zealand](https://www.health.govt.nz/our-work/diseases-and-conditions/covid-19-novel-coronavirus/covid-19-response-planning/covid-19-elimination-strategy-aotearoa-new-zealand)
- 942 27. Laurent G, Kapferer J.-N, Measuring consumer involvement profiles. *J. Mark. Res.*  
943 1985; 22: 41-53.
- 944 28. Kaine G, A pilot application of the I<sub>3</sub> framework to compliance behaviour in farming.  
945 Landcare Research Contract Report LC3513; 2019.
- 946 29. Olsen SO, Strength and conflicting valence in measurement of food attitudes and  
947 preferences. *Food Quality and Preferences* 1999; 10: 483–494.
- 948 30. Daoust JF, Nadeau R, Dassonneville R, Lachapelle E, Bélanger É, Savoie J, van der  
949 Linden C, How to survey citizens’ compliance with COVID-19 Public Health  
950 Measures: evidence from three survey experiments. *Journal of Experimental Political*  
951 *Science* 2020;1-8.
- 952 31. Daoust JF, Bélanger É, Dassonneville R, Lachapelle E, Nadeau R, Becher M, Brouard S,  
953 Foucault M, Hönnige C, Stegmüller D, A guilt-free strategy increases self-reported  
954 noncompliance with COVID-19 preventive measures: Experimental evidence from 12  
955 countries. *PLoS ONE*. 2021; 16(4): e0249914.  
956 <https://doi.org/10.1371/journal.pone.0249914>
- 957 32. Aldenderfer MS, Blashfield RK, Cluster analysis. Sage, Newbury Park, California; 1984.
- 958 33. IBM Corp. IBM SPSS Statistics for Windows, Version 27.0. 2020. Armonk, NY: IBM  
959 Corporation.
- 960 34. Carmines EG, Zeller RA. Reliability and validity assessment. 1979, Newbury Park, CA:  
961 Sage.
- 962 35. Kaine G, Willingness to wear masks, self-isolate and test for Covid-19 and implications  
963 for compliance. Landcare Research Contract Report LC3867; 2020.



- 964 36. Wilson S, Pandemic leadership: Lessons from New Zealand’s approach to COVID-19.  
965 Leadership 2020; 16: 279-293. (doi:10.1177/1742715020929151)
- 966 37. Tukey J. Comparing Individual Means in the Analysis of Variance. 1949. Biometrics,  
967 5(2), 99-114. doi:10.2307/3001913
- 968 38. Allington D, Duffy B, Wessely S, Dhavan N & Rubin J. Health-protective behaviour,  
969 social media usage, and conspiracy belief during the COVID-19 public health  
970 emergency. 2020. Psychological Medicine.  
971 <https://doi.org/10.1017/S003329172000224X>
- 972 39. Imhoff R, Lamberty P, A bioweapon or a hoax? The link between distinct conspiracy  
973 beliefs about the Coronavirus disease (COVID-19) outbreak and pandemic behavior.  
974 2020. <https://doi.org/10.1177/1948550620934692>
- 975 40. Lieberoth A, Lin S-Y, Stöckli S, Han H, Kowal M, Gelpi R, et al., Stress and worry in the  
976 2020 coronavirus pandemic: relationships to trust and compliance with preventive  
977 measures across 48 countries in the COVIDiSTRESS global survey, 2021, R. Soc. open  
978 sci.8200589200589, <http://doi.org/10.1098/rsos.200589>
- 979 41. Howard J, Huang A, Li Z, Tufekci Z, Zdimal V, van der Westhuizen H-M, et al. An  
980 evidence review of face masks against COVID-19. 2021. Proceedings of the National  
981 Academy of Sciences Jan 2021, 118 (4) e2014564118; DOI: 10.1073/pnas.2014564118
- 982 42. Gray L, MacDonald C, Tassell-Matamua N, Stanley J, Kvalsvig A, Zhang J, et al.,  
983 Wearing one for the team: views and attitudes to face covering in New  
984 Zealand/Aotearoa during COVID-19 Alert Level 4 lockdown. 2020, J Prim Health  
985 Care. 2020 Sep;12(3):199-206. doi: 10.1071/HC20089. PMID: 32988441.
- 986 43. Bridgman A, Merkley E, Loewen PJ, Owen T, Ruths D, Teichmann L, et al, The causes  
987 and consequences of COVID-19 misperceptions: Understanding the role of news and

- 988 social media. The Harvard Kennedy School (HKS) Misinformation Review, 2020; 1:  
989 Special Issue on COVID-19 and Misinformation.
- 990 44. Vally Z. Public perceptions, anxiety, and the perceived efficacy of health-protective  
991 behaviours to mitigate the spread of the SARS-Cov-2/COVID-19 pandemic. Public  
992 Health. 2020. doi:10.1016/j.puhe.2020.08.002
- 993 45. Taylor S, Asmundson GJG. Negative attitudes about facemasks during the COVID-19  
994 pandemic: The dual importance of perceived ineffectiveness and psychological  
995 reactance. 2021. PLoS ONE 16(2): e0246317. [https://doi.](https://doi.org/10.1371/journal.pone.0246317)  
996 [org/10.1371/journal.pone.0246317](https://doi.org/10.1371/journal.pone.0246317)
- 997 46. Isch, C., Guevara Beltran, D., Ayers, J. D., Alcock, J., Cronk, L., Hurmuz-Sklia, H., ...  
998 Aktipis, A. (2021, March 28). What predicts attitudes about mask wearing?  
999 <https://doi.org/10.31234/osf.io/jvspx>
- 1000 47. Zhang X, Wang F, Zhu C, Wang Z. Willingness to Self-Isolate When Facing a Pandemic  
1001 Risk: Model, Empirical Test, and Policy Recommendations. Int J Environ Res Public  
1002 Health. 2019;17(1):197. Published 2019 Dec 27. doi:10.3390/ijerph17010197
- 1003 48. Escandon-Barbosa D. Hurtado A. Gomez A. Factors Affecting Voluntary Self-Isolation  
1004 Behavior to Cope with a Pandemic: Empirical Evidence from Colombia vs. Spain in  
1005 Times of COVID-19. 2021. Behav. Sci., 11, 35. <https://doi.org/10.3390/bs11030035>
- 1006 49. Lan R, Sujanto R, Lu K, He Z, Zhang CJP, Ming WK. Perceived Effectiveness, Safety,  
1007 and Attitudes Toward the Use of Nucleic Tests of SARS-CoV-2 Among Clinicians and  
1008 General Public in China. Front Public Health. 2020;8:599862. Published 2020 Dec 17.  
1009 doi:10.3389/fpubh.2020.599862
- 1010 50. Lang, R., Benham, J.L., Atabati, O. et al. Attitudes, behaviours and barriers to public  
1011 health measures for COVID-19: a survey to inform public health messaging. BMC  
1012 Public Health 21, 765 (2021). <https://doi.org/10.1186/s12889-021-10790-0>

1013 51. West, R., Michie, S., Rubin, G.J. et al. Applying principles of behaviour change to reduce  
1014 SARS-CoV-2 transmission. *Nat Hum Behav* 4, 451–459 (2020).

1015 <https://doi.org/10.1038/s41562-020-0887-9>

1016 52. Stats NZ. Estimated resident population (ERP), subnational population by ethnic group,  
1017 age, and sex, at 30 June 1996, 2001, 2006, 2013, and 2018 (2020).

1018 <http://nzdotstat.stats.govt.nz/WBOS/Index.aspx?DataSetCode=TABLECODE7512#>

1019 53. Stats NZ. Highest qualification and ethnic group (grouped total responses) by age group  
1020 and sex, for the census usually resident population count aged 15 years and over, 2006,  
1021 2013, and 2018 Censuses (2020).

1022 [http://nzdotstat.stats.govt.nz/wbos/Index.aspx?\\_ga=2.69061078.636843804.160211775](http://nzdotstat.stats.govt.nz/wbos/Index.aspx?_ga=2.69061078.636843804.1602117753761746062.1551927941#)  
1023 [3761746062.1551927941#](http://nzdotstat.stats.govt.nz/wbos/Index.aspx?_ga=2.69061078.636843804.1602117753761746062.1551927941#)

1024 54. Stats NZ. Household income by region, household type, and source of household income  
1025 (2020).

1026 [http://nzdotstat.stats.govt.nz/wbos/Index.aspx?\\_ga=2.69061078.636843804.160211775](http://nzdotstat.stats.govt.nz/wbos/Index.aspx?_ga=2.69061078.636843804.1602117753-761746062.1551927941#)  
1027 [3-761746062.1551927941#](http://nzdotstat.stats.govt.nz/wbos/Index.aspx?_ga=2.69061078.636843804.1602117753-761746062.1551927941#)

1028

## 1029 **Supporting information**

1030 **S1 File. Questionnaire**

1031 **S2 File. Data**

1032 **S3 Fig. S3 Fig**

1033 **S4 File. Appendix A**

1034

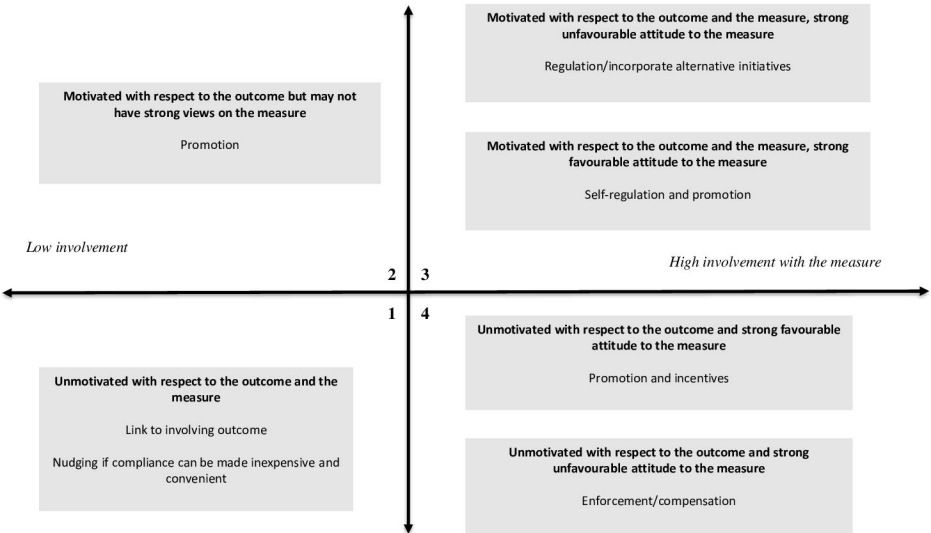

**Motivated with respect to the outcome and the measure, strong unfavourable attitude to the measure**

Regulation/incorporate alternative initiatives

**Motivated with respect to the outcome and the measure, strong favourable attitude to the measure**

Self-regulation and promotion

**Motivated with respect to the outcome but may not have strong views on the measure**

Promotion

**Unmotivated with respect to the outcome and strong favourable attitude to the measure**

Promotion and incentives

**Unmotivated with respect to the outcome and strong unfavourable attitude to the measure**

Enforcement/compensation

**Unmotivated with respect to the outcome and the measure**

Link to involving outcome

Nudging if compliance can be made inexpensive and convenient

*Low involvement*

*High involvement with the measure*

2

3

1

4

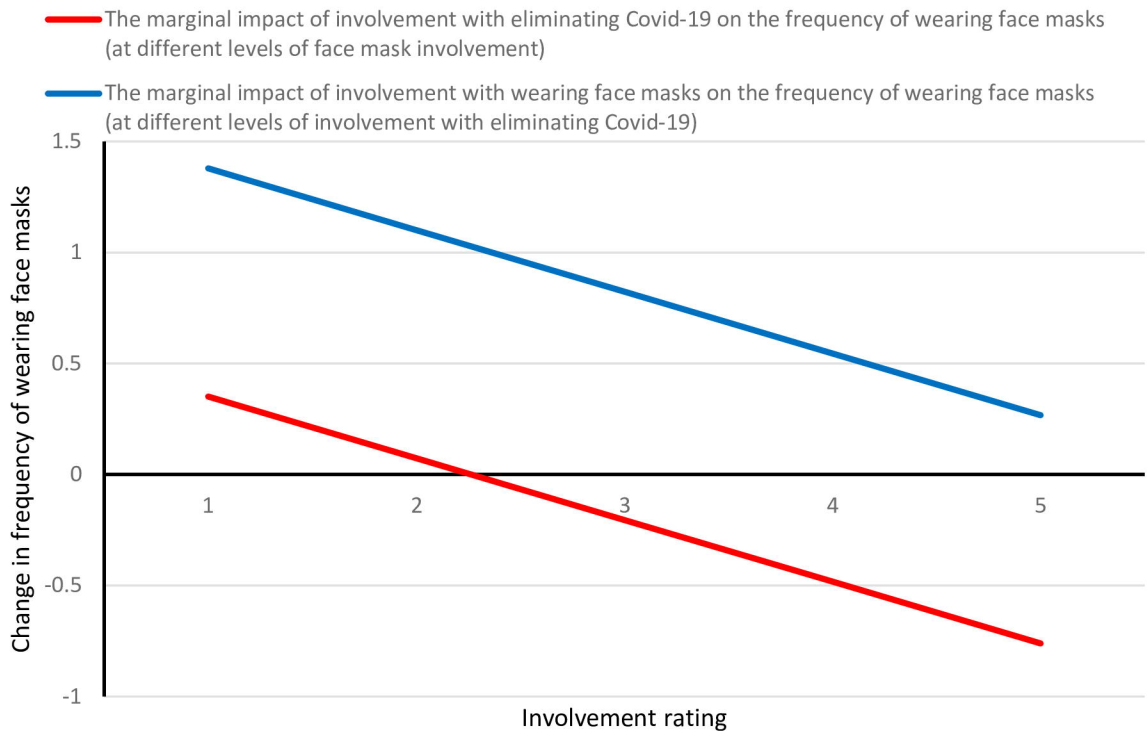

S3. Changes in the marginal impact of increasing involvement with eliminating Covid-19 and wearing face masks on frequency of wearing face masks. The marginal impact of an increase in involvement with wearing face masks on frequency decreases with higher levels of involvement with eliminating Covid-19 (and vice versa). For example, the red line shows that an increase in involvement with eliminating Covid-19 has a decreasing impact on frequency of wearing face masks as involvement with wearing face masks increases.

Involvement was rated on a scale from a minimum of 1 (low) to a maximum of 5 (high).

Frequency was rated on a scale from a minimum of 1 (never) to a maximum of 5 (always).
