1 **Compliance with Covid-19 measures: evidence from New**  
2 **Zealand**

3

4 Geoff Kaine<sup>1\*</sup>, Suzie Greenhalgh<sup>2</sup> and Vic Wright<sup>3</sup>

5

6 <sup>1</sup> Manaaki Whenua Landcare Research, Hamilton, New Zealand

7 <sup>2</sup> Manaaki Whenua Landcare Research, Auckland, New Zealand

8 <sup>3</sup> University of New England, Armidale, New South Wales, Australia

9

10 \* Corresponding author.

11 Email: [kaineg@landcareresearch.co.nz](mailto:kaineg@landcareresearch.co.nz) (GK)

12

13 These authors contributed equally to this work.

14

## 15 **Abstract**

16 Governments around the world are seeking to slow the spread of Covid-19 by implementing  
17 measures that encourage, or mandate, changes in people’s behaviour. These changes include  
18 the wearing of face masks, social distancing, and testing and self-isolating when unwell. The  
19 success of these measures depends on the commitment of individuals to change their  
20 behaviour accordingly. Understanding and predicting the motivation of individuals to change  
21 their behaviour is therefore critical in assessing the likely effectiveness of these measures in  
22 slowing the spread of the virus.

23

24 In this paper we draw on a novel framework, the I<sub>3</sub> Compliance Response Framework, to  
25 understand and predict the motivation of residents in Auckland, New Zealand, to comply  
26 with measures to prevent the spread of Covid-19. The Framework is based on two concepts.  
27 The first uses the involvement construct to predict the motivation of individuals to comply.  
28 The second separates the influence of the policy measure from the influence of the policy  
29 outcome on the motivation of individuals to comply.

30

31 The Framework differentiates between the strength of individuals’ motivation and their  
32 beliefs about the advantages and disadvantages of policy outcomes and policy measures. We  
33 show this differentiation is useful in predicting an individual’s possible behavioural responses  
34 to a measure and how it assists government agencies to develop strategies to enhance  
35 compliance.

36

37

38

## 39 **Introduction**

40 The success of measures to slow or stop the spread of Covid-19 such as wearing face masks  
41 and social distancing, depends on the commitment and capacity of individuals to comply with  
42 them, and change their behaviour accordingly [1-3]. Ineffective compliance with these  
43 measures can put the achievement of policy outcomes at risk [4,5]. For example, failure to  
44 wear face masks and socially distance may put the outcome of eliminating Covid-19 from  
45 countries such as New Zealand at risk and may mean considerable resources must be invested  
46 in enforcement to avoid increased rates of infection, higher mortality, and the imposition of  
47 lockdowns causing both economic and psychological damage. Hence, understanding and  
48 predicting the extent to which individuals are motivated to change their behaviour to comply  
49 with measures is critical in assessing how effective these measures are likely to be, and  
50 whether alternatives such as curfews and lockdown can be avoided.

51

52 In this paper we draw on a novel framework, the I<sub>3</sub> Response Framework (Kaine et al., 2010),  
53 to understand and predict the motivation of residents of Auckland, New Zealand, to comply  
54 with measures to prevent the spread of Covid-19, such as the wearing of face masks, self-  
55 isolating when unwell, and getting tested for Covid-19. The Framework is applied to model  
56 the engagement with, and beliefs and feelings about, government measures proposed or taken  
57 to deal with some policy outcome. The target group is composed of those whose acceptance  
58 of the measures, which is not inevitable, is essential for the achievement of the desired policy  
59 outcome.

60

61

62

## 63 **Background**

64 Kaine et al. (2010) proposed that theories about people’s responses to policy measures have a  
65 common underpinning, whether grounded in the economics of rational choice or more  
66 behavioural, such that people’s decision-making is motivated by the achievement of personal  
67 goals, and the importance of a decision to an individual influences the extent to which they  
68 will devote cognitive effort to gathering information, processing that information,  
69 formulating attitudes, and reaching a decision. Kaine et al. (2010) suggested that these  
70 theories cannot be expected to predict behaviour when a decision is not perceived to be  
71 important enough (i.e. sufficiently relevant to people’s personal goals) to trigger the effort  
72 required to form an attitude that has the power to influence their behaviour. Consequently, to  
73 predict how people may or may not respond to any given policy measure, it is necessary to  
74 understand whether they are likely to invest effort in decision-making regarding that measure.

75

76 As explained in detail in Kaine et al. (2010), the effort people will devote to decision-making  
77 about complying with a policy measure will depend on their *involvement* with the policy  
78 *issue* (in this case the policy outcome of eliminating Covid-19 from New Zealand) and the  
79 *intervention* (the policy measure, such as wearing face masks, self-isolating if unwell and  
80 being tested for Covid-19), with the former being an important component of the context for  
81 the latter.<sup>1</sup>

82

83 In a specific applied setting, such as a policy to eliminate Covid-19, the Framework enables  
84 the prediction of likely compliance with policy measures and, given the reasons for their  
85 involvement and their attitudes, the best ways to enhance that compliance.

---

<sup>1</sup> Hence  $I_3$ .

## 86 **Predicting behaviour**

87 The behaviour changes to be analysed with the I<sub>3</sub> Framework occur in a public policy context  
88 rather than a commercial context. This means the outcome(s) sought are typically declared,  
89 and government, or its agencies, intervene with measures designed to modify behaviour in  
90 pursuit of the outcome(s). Either compulsion or voluntary responses may be involved, but  
91 compliance is central to achieving outcomes. In what follows in this section we have drawn  
92 extensively on the discussion of the interpretation of Framework findings from Kaine et al.  
93 (2010) to make it readily accessible for the reader.

94

95 Kaine et al. (2010) proposed that people's responses to policy measures, such as the  
96 requirement to wear face masks, can be inferred from their:

- 97 • involvement with the relevant policy outcome (preventing the spread of Covid-19)
- 98 • involvement with and attitude towards the policy measure itself (e.g. wearing face  
99 masks).

100 Involvement with the policy measure signals the degree to which the measure itself is a  
101 source of motivation for the individual, irrespective of the policy issue (Kim, 2003;  
102 Zaichowsky, 1985). This allows for the possibility that individuals are motivated to act in  
103 response to a measure even though they do not perceive the policy outcome the measure  
104 addresses to be relevant to them. In such situations, it may be that the wish to comply is  
105 motivated by involvement with some other outcome, such as achieving perceived conformity  
106 with social norms (Ajzen and Fishbein, 1977).

107

108 However, the perceived relevance of a policy outcome is plainly relevant to an individual's  
109 cognitions about related measures. One would expect a positive correlation between

110 involvements with each. The value of the Framework is that it enables a decomposition of  
111 overall involvement with a policy outcome and corresponding measures, as well as  
112 distinguishing between involvement with different measures and closer analysis of the role of  
113 beliefs held by individuals, as informational contexts for attitudes.

114

115 The two dimensions of involvement with the policy outcome and involvement with the policy  
116 measure mean that the responses of people to a policy measure can be classified into four  
117 quadrants, as shown in Fig 1.

118

119 People in quadrant 1 exhibit low involvement in both the policy outcome and the policy  
120 measure. These people are likely to have little knowledge, or even awareness, of the policy  
121 outcome and are likely to have limited knowledge of the policy measure, and to have weak  
122 attitudes towards it, if any at all. In terms of Kassarian (1981), these people may appear to be  
123 either detached (i.e. they have other interests and concerns) or ‘know-nothings’ (people who  
124 do not particularly care about or have no interest in the outcome). Non-compliance with the  
125 measure is largely unintentional (Murdoch et al., 2006). Chaffee and Roser (1986, p. 376)  
126 describe their behaviour as being ‘a direct response to situational constraints and not  
127 especially reflective of one’s attitudes or knowledge.’

128

129 If people in quadrant 1 present little risk in terms of achieving aggregate policy outcome  
130 targets, they can be ignored (Kaine et al., 2010). Otherwise, their compliance with the  
131 measure may be encouraged by:

- 132 • linking the policy outcome to a subject they find more involving
- 133 • reducing the effort required to be compliant
- 134 • promoting awareness of the policy outcome and the policy measure.

135 However, the last strategy is likely to be ineffective, because people in this quadrant are  
136 unlikely to pay attention to promotional messaging because they are disinterested: the  
137 challenge to promoting appropriate responses for individuals in this quadrant is that, due to  
138 their low involvement, they are not likely to attend to the information provided.

139

140 **Fig 1. Map and explanation of quadrants in the I<sub>3</sub> framework.**

141

142 Kim (2003) suggests that an affect-evoking strategy (i.e. one that evokes an emotional  
143 response) should be the most effective means of attracting attention under these  
144 circumstances. This is most likely to be achieved by focusing on the policy outcome as low  
145 involvement, with the outcome acting as a hurdle to greater involvement with individual  
146 measures.

147

148 People in quadrant 2 exhibit high involvement with the policy outcome but low involvement  
149 with the measure. Consequently, they would be aware of the outcome and invest time and  
150 energy in processing information, decision-making and responding to the outcome (Chaffee  
151 and Roser, 1986; Petty and Cacioppo, 1984). They may have limited knowledge of the policy  
152 measure and may have weak or ambiguous attitudes towards it. Any non-compliance with the  
153 measure is largely unintentional (Kaine et al., 2010).

154

155 If people in quadrant 2 represent little risk in terms of achieving the policy outcome they can  
156 be ignored. If their compliance is important to achieving the policy outcome, reducing the  
157 effort required for compliance (Thaler and Sunstein, 2008) and promoting awareness of the  
158 policy measure may be worthwhile by taking advantage of the intensity of their involvement  
159 with the policy outcome, particularly when this is accompanied by favourable attitudes.

160 People in quadrant 3 exhibit high involvement with both the policy outcome and the measure.  
161 These people are likely to have extensive and detailed knowledge of the policy outcome.  
162 They are also likely to have extensive knowledge of the policy measure and strong attitudes  
163 towards it (Petty and Cacioppo, 1984). If their attitude towards the policy measure is  
164 favourable, they will comply with the measure and may even advocate for it (Murdoch et al.,  
165 2006). Consequently, a strategy for promoting compliance among individuals in this quadrant  
166 with a favourable attitude might focus on self-regulation, using mechanisms such as  
167 voluntary codes of conduct. Promotion and monitoring may also be worthwhile to ensure  
168 awareness and knowledge of obligations, ensure desirable behaviours are maintained, and  
169 identify at an early stage any changes in their attitude (Kaine et al., 2010).

170

171 If people in quadrant 3 have an unfavourable attitude towards the policy measure, they may  
172 comply, but reluctantly (Kaine et al., 2010). Non-compliance with the measure will be  
173 intentional. Most likely they will prefer – and even advocate for – changes to the design of  
174 the policy measure. Where practical, incorporating these changes may encourage the  
175 compliance of these people (Gunningham et al., 1998). Alternatively, offering incentives to  
176 reduce compliance costs may neutralise unfavourable reactions.

177

178 Another strategy for promoting compliance among individuals in this quadrant with an  
179 unfavourable attitude is to change their attitude towards the measure. This may be possible by  
180 reframing the benefits of the measure in terms of another, more involving subject (Kaine et  
181 al., 2010), thus provoking a recalculation of net costs and benefits. Alternatively, a  
182 promotional programme may be implemented with the outcome of persuading these  
183 individuals they are mistaken, and that the behaviours required by the policy measure are  
184 superior to any alternatives. Finally, compliance among these individuals might be increased



185 by investing resources in enforcement, to increase the likelihood of detection and  
186 prosecution, and legislating severe penalties for non-compliance.

187

188 Note that if the causes of non-compliance relate to unpredictable variations in the  
189 environment, or to unforeseeable technical problems, then enforcement and general  
190 deterrence may be ineffective. A more appropriate strategy in these circumstances may be to  
191 focus on the provision of technical assistance (Davies et al., 2007; Carlough, 2003).

192

193 People in quadrant 4 exhibit low involvement with the policy outcome but high involvement  
194 with the measure. People in this quadrant are likely to have limited knowledge of the policy  
195 outcome. They are likely to have detailed knowledge of the policy measure and have strong  
196 attitudes towards it (Petty and Cacioppo, 1984). If their attitude towards the measure is  
197 favourable, then they will comply with the measure (Kaine et al., 2010). In these  
198 circumstances, the government agency may play a monitoring role to check that the  
199 conditions promoting compliance do not change. A promotional strategy to support and  
200 reinforce compliance behaviour may also be worthwhile.

201

202 On the other hand, if the members of this quadrant have an unfavourable attitude towards the  
203 policy measure, they will only comply reluctantly, or may intentionally refuse to comply at  
204 all. These people will regard the measure as imposing unwarranted costs upon them. Most  
205 likely they will agitate against the policy measure (Kaine et al., 2010) because they are not  
206 committed to the outcome. One strategy for promoting compliance among these individuals  
207 is to change their attitude towards the measure. This may be possible by reframing it in terms  
208 of another, more involving subject (Kaine et al., 2010). Offering incentives to offset  
209 compliance costs, or delaying or staging the introduction of policy measures, may neutralise

210 unfavourable reactions (Gunningham et al., 1998). Finally, compliance among these  
211 individuals might be increased by investing resources in enforcement to increase the  
212 likelihood of detection and prosecution of, and by introducing severe penalties for, non-  
213 compliance.

214

215 In summary, Kaine et al. (2010) hypothesised that individual responses to policy measures  
216 will depend on the intensity and source of involvement of the individual with the measure  
217 and, where that involvement is sufficiently intense to form an attitude, on whether that  
218 attitude is favourable or unfavourable. The I<sub>3</sub> Framework has been employed to understand  
219 and predict compliance behaviour in a variety of contexts in agriculture (Davies et al., 2007;  
220 Kaine and Tostovrsnik, 2011; Lourey et al., 2011; Kaine, 2019a), rural and urban predator  
221 control (Kaine and Kirk, 2020; Kaine and Stronge, 2020), and community support for  
222 predator control (Kaine et al., 2020).

223

## 224 **The case study**

### 225 **Background**

226 Covid-19 was first detected in New Zealand on 28 February 2020 (New Zealand Government  
227 2021). Within three weeks the central government had closed New Zealand's international  
228 border to all except returning citizens and permanent residents. The government began  
229 pursuing a restrictive strategy (Travica 2020) of eliminating Covid-19 and applied a range of  
230 control measures to stop the transmission of Covid-19 in New Zealand (Ministry of Health  
231 2021). Elimination did not necessarily mean eradicating the virus permanently from New  
232 Zealand; rather, that central government was confident chains of transmission in the

233 community had been eliminated for at least 28 days, and any cases imported from overseas in  
234 the future could be effectively contained (Ministry of Health 2021).

235

236 The central government instituted a four-tier alert system that mandated measures such as:  
237 progressively tighter restrictions on people's movement outside their homes and immediate  
238 families, including travelling to work; social distancing and encouraging the wearing of  
239 masks outside the home at the higher alert levels; and self-isolating and seeking testing if  
240 people felt unwell or experienced symptoms characteristic of Covid-19 infection (New  
241 Zealand Government 2021).

242

243 On 25 March New Zealand moved to a Level 4 'lockdown', the highest level of alert and a  
244 National State of Emergency was declared (New Zealand Government 2021). At this alert  
245 level people are instructed to stay at home other than for essential personal movement such as  
246 health or essential shopping, safe recreational activity is allowed in the local area, and travel  
247 is severely limited. All gatherings are cancelled, and all public venues are closed. Businesses  
248 are closed except for essential services (for example, supermarkets, pharmacies, health  
249 clinics, petrol stations and lifeline organisations). All educational facilities are closed (New  
250 Zealand Government 2021).

251

252 As the spread of the virus slowed and stopped, the country progressively moved to lower alert  
253 levels: Level 3 towards the end of April and Level 2 in early May. Alert Level 1 was re-  
254 introduced on 8 June because community transmission had halted and there were no active  
255 cases in the country outside the managed isolation and quarantine facilities (MIQ)  
256 specifically established to quarantine all incoming travellers to New Zealand who test  
257 positive for Covid-19 (New Zealand Government 2021).

258 However, on 11 August 2020 four new cases were detected in Auckland. Auckland returned  
259 the next day to Alert Level 3 with the rest of the country at Alert Level 2. Auckland remained  
260 at Alert Level 3 until 30 August, when it moved to Level 2, with additional restrictions on  
261 travel and the size of gatherings. The rest of the country remained at the standard Alert Level  
262 2 until 21 September, when the alert level was downgraded to Level 1. The extra restrictions  
263 on Auckland residents were relaxed on 21 September and they returned to Alert Level 1 on 7  
264 October 2020 (New Zealand Government 2021).

265

## 266 **Methods**

267 A questionnaire seeking information from the public on their beliefs about, attitudes towards,  
268 and willingness to wear face masks, self-isolate and be tested for Covid-19 was designed  
269 based on the I<sub>3</sub> Compliance Framework (Kaine et al., 2010). Involvement was measured  
270 using a condensed version of the Laurent and Kapferer (1985) involvement scale developed  
271 by Kaine (2019b), with respondents rating two statements on each of the five components of  
272 involvement (functional, experiential, identity-based, risk-based, and consequence-based).  
273 Attitudes were measured using a simple, evaluative scale, while the strength of respondents'  
274 attitudes, which were expected to vary depending on the strength of their involvement, was  
275 measured using an ipsative scale based on Olsen (1999).

276

277 A series of questions was formulated to elicit respondents' beliefs about Covid-19,  
278 eliminating Covid-19, wearing face masks, self-isolating and getting tested for Covid-19.

279 Finally, information was sought on the demographic characteristics of respondents, including  
280 age, education, and ethnicity, and whether they wore masks, would self-isolate and had been  
281 tested for Covid-19.<sup>2</sup>

282

283 The ordering of the statements in the involvement, attitude and belief scales was randomised  
284 to avoid bias in responses. Respondents indicated their agreement with statements in all the  
285 involvement, attitude and belief scales using a five-point rating, ranging from strongly  
286 disagree (1) to strongly agree (5).

287

288 Participation in the survey was voluntary, respondents could leave the survey at any time, and  
289 all survey questions were optional and could be skipped. The research approach was  
290 reviewed and approved by Manaaki Whenua – Landcare Research’s internal social ethics  
291 process (application no. 2021/10 NK).

292

293 The questionnaire was completed online by a random sample of members of a consumer  
294 internet panel living in Auckland. Auckland was chosen for the survey because this is the  
295 mostly likely place for new community transmission given the number of MIQ facilities and  
296 frontline border workers who are most at risk of being exposed to Covid-19.

297

298 The survey was conducted over two weeks from 7 September to 22 September 2020. Most of  
299 this time Auckland residents were under Alert Level 2, which meant they were expected to  
300 maintain social distancing when outside their homes and to wear masks in public places.

301 They were also expected to keep track of their movements and to self-isolate and seek testing

---

<sup>2</sup> The ethnicity categories were Māori (indigenous people of New Zealand), European New Zealander, Pacific Islander, Asian and Other.

302 for Covid-19 if they felt unwell and experienced symptoms associated with Covid-19. A total  
303 of 1,001 completed responses were obtained, of which 53% were from women and 47% were  
304 from men.

305

306 The age distribution aligned with the distribution for Auckland in the 2018 New Zealand  
307 Census, but Māori and Pacific Island residents were under-represented in the sample while  
308 European New Zealand residents were over-represented.<sup>3</sup> Very-low-income households  
309 (<\$20,000) and very-high-income households (>\$100,000) were under-represented in the  
310 sample, while low-, middle- and high-income households were over-represented.<sup>4</sup> Residents  
311 with secondary or certificate qualifications were substantially under-represented in the  
312 sample, while residents with graduate and postgraduate qualifications were substantially  
313 over-represented (see Kaine 2020 for details).<sup>5</sup>

314

315 Involvement scores were computed for each respondent as the simple arithmetic average of  
316 their agreement ratings for the 10 statements in the involvement scales. Attitudes scores were  
317 computed as the simple arithmetic average of their agreement ratings for the five statements  
318 in the attitude scales. Respondents were classified into belief segments based on their  
319 agreement ratings with the set of relevant belief statements using Ward's method, with  
320 squared Euclidean distance as the measure of dissimilarity (Aldenderfer and Blashfield,  
321 1984). Note that, for all belief, involvement and evaluative attitudinal statements, respondents  
322 were instructed to indicate their agreement with a statement using a five-point rating scale,  
323 from strongly disagree (1) to strongly agree (5).

---

<sup>3</sup> <http://nzdotstat.stats.govt.nz/WBOS/Index.aspx?DataSetCode=TABLECODE7512#>

<sup>4</sup> [http://nzdotstat.stats.govt.nz/wbos/Index.aspx?\\_ga=2.69061078.636843804.1602117753-761746062.1551927941#](http://nzdotstat.stats.govt.nz/wbos/Index.aspx?_ga=2.69061078.636843804.1602117753-761746062.1551927941#)

<sup>5</sup> <http://nzdotstat.stats.govt.nz/WBOS/Index.aspx?DataSetCode=TABLECODE7512#>

## 324 **Results**

### 325 **General**

326 Respondents' involvement with the policy outcome (eliminating Covid-19) and wearing face  
327 masks, self-isolating when unwell, and getting tested for Covid-19 (the policy measures) are  
328 summarised in Tables 1, 2 and 3, respectively. Most respondents exhibited moderate to high  
329 involvement with eliminating Covid-19 from New Zealand and with the three policy  
330 measures (see Kaine (2020) for more detail). However, a substantial minority of respondents  
331 exhibited low-to-mild involvement with wearing face masks and getting tested for Covid-19.  
332 This result suggests a minority of Auckland residents may inadvertently fail to comply with  
333 government measures intended to prevent the spread of Covid-19 in the community.

334

335 Most respondents exhibited a strongly favourable attitude, as measured by the ipsative  
336 attitude scale, towards mask wearing, self-isolating and getting tested. These results suggest a  
337 small minority of Auckland residents would deliberately choose not to comply with  
338 government measures intended to prevent the spread of Covid-19 in the community. These  
339 results and their implications for government policy are discussed in detail by Kaine (2020).

340

341

342

343 **Table 1. I<sub>3</sub> mapping for wearing face masks**

| Quadrant   | Favourable attitude | Unsure | Unfavourable attitude | Total |
|------------|---------------------|--------|-----------------------|-------|
| Quadrant 1 | 3                   | 4      | 2                     | 9     |
| Quadrant 2 | 7                   | 9      | -                     | 16    |
| Quadrant 3 | 59                  | 11     | 3                     | 73    |
| Quadrant 4 | 1                   | -      | -                     | 2     |
| Total      | 70                  | 24     | 5                     | 100   |

344

345 Notes: Values are percentages of the sample.

346

347 **Table 2. I<sub>3</sub> mapping for self-isolating**

| Quadrant   | Favourable attitude | Unsure | Unfavourable attitude | Total |
|------------|---------------------|--------|-----------------------|-------|
| Quadrant 1 | 1                   | 1      | -                     | 2     |
| Quadrant 2 | 5                   | 1      | 1                     | 7     |
| Quadrant 3 | 74                  | 6      | 5                     | 85    |
| Quadrant 4 | 4                   | 1      | 1                     | 6     |
| Total      | 84                  | 9      | 7                     | 100   |

348

349 Notes: Values are percentages of the sample.

350

351 **Table 3. I<sub>3</sub> mapping for testing**

| Quadrant   | Favourable attitude | Unsure | Unfavourable attitude | Total |
|------------|---------------------|--------|-----------------------|-------|
| Quadrant 1 | 3                   | 4      | -                     | 7     |
| Quadrant 2 | 14                  | 6      | 1                     | 21    |
| Quadrant 3 | 59                  | 9      | 2                     | 70    |
| Quadrant 4 | 1                   | 1      | -                     | 2     |
| Total      | 77                  | 20     | 3                     | 100   |

352 Notes: Values are percentages of the sample.

353 **Belief segments**



354 Respondents' beliefs were investigated because they can provide insights to guide the design  
355 of policies that, by modifying the beliefs and attitudes that underly compliance, seek to  
356 influence compliance. Using respondent agreement ratings for the relevant set of belief  
357 statements, respondents were classified into belief segments with respect to the nature of  
358 Covid-19, and the advantages and disadvantages of eliminating Covid-19 (the policy  
359 outcome), wearing face masks, self-isolating when unwell, and testing (the policy measures).  
360 Respondents were classified into segments using Ward's method, with squared Euclidean  
361 distance as the measure of dissimilarity (Aldenderfer and Blashfield, 1984).

362

363 The number of segments was chosen based on the relative change in fusion coefficients, ease  
364 of interpreting the segments, and a desire to keep the number of segments as small as possible  
365 (Aldenderfer and Blashfield, 1984). The segments, and their belief characteristics, are  
366 summarised below.

367

### 368 **Belief segments for Covid-19**

369 Respondents were classified into five belief segments with respect to Covid-19 (Table 4).  
370 Most respondents had beliefs that align with accepted scientific facts. These respondents  
371 were classified as 'Covid-19 enthusiasts' (41%) and 'Covid-19 moderates' (25%), the  
372 difference between these two segments being the intensity of their beliefs. The 'Covid-19  
373 safe healthy' (9%) had beliefs that mostly align with accepted scientific facts, but these  
374 respondents believed Covid-19 only posed a danger to the elderly and people with health  
375 problems. A fourth segment, the 'Covid-19 ambivalents' (15%), consisted of respondents  
376 who were unsure about what to believe about Covid-19.

377 **Table 4.** Belief segments for Covid-19<sup>1</sup>

| Statement                                                                | Covid-19 enthusiasts<br>(41%) | Covid-19 moderates<br>(25%) | Covid-19 ambivalents<br>(15%) | Covid-19 safe healthy<br>(9%) | Covid-19 sceptics<br>(10%) |
|--------------------------------------------------------------------------|-------------------------------|-----------------------------|-------------------------------|-------------------------------|----------------------------|
| Coughing and sneezing spreads Covid-19                                   | 4.74                          | 3.82                        | 4.2                           | 4.55                          | 3.75                       |
| Covid-19 spreads from surfaces touched by infected people                | 4.15                          | 3.78                        | 3.97                          | 4.11                          | 3.57                       |
| Covid-19 is only a danger to the elderly and people with health problems | 1.34                          | 1.8                         | 2.91                          | 4.29                          | 3.97                       |
| You are immune to re-infection once you have had Covid-19                | 1.97                          | 2.29                        | 2.79                          | 2.24                          | 3.57                       |
| Children cannot catch Covid-19                                           | 1.13                          | 1.67                        | 2.22                          | 1.36                          | 3.07                       |
| Children are perfectly safe from Covid-19                                | 1.25                          | 1.7                         | 2.17                          | 1.47                          | 3.43                       |
| You cannot catch the virus from people without symptoms                  | 1.34                          | 1.8                         | 2.27                          | 1.53                          | 3.58                       |
| Covid-19 is a hoax                                                       | 1.07                          | 1.55                        | 2.14                          | 1.31                          | 3.55                       |
| Fears about Covid-19 are exaggerated                                     | 1.55                          | 2.24                        | 3.31                          | 2.28                          | 3.78                       |
| Covid-19 is no worse than the seasonal flu                               | 1.32                          | 2.23                        | 3.33                          | 1.71                          | 3.65                       |
| Covid-19 is man-made                                                     | 2.24                          | 2.57                        | 3.08                          | 2.62                          | 3.84                       |
| Covid-19 comes from bats                                                 | 2.97                          | 2.95                        | 2.74                          | 2.96                          | 3.48                       |

378 Notes: Values are mean agreement ratings. Ratings ranged from a minimum of 1 (strongly disagree) to a maximum of 5 (strongly agree).

379 <sup>1</sup> Mean agreement ratings on all statements were statistically significant different across segments ( $p < 0.01$ ).

380 A small segment of respondents, the ‘Covid-19 sceptics’ (10%) believed, variously, that  
381 Covid-19 was a hoax, was no worse than the seasonal flu, and that fears about Covid-19 are  
382 exaggerated.

383

384 A relatively high proportion of respondents in the ‘Covid-19 enthusiasts’ segment were  
385 European New Zealanders and respondents over the age of 50. A relatively high proportion  
386 of respondents in the ‘Covid-19 sceptics’ segment were Māori and Pacific Islanders and  
387 respondents under the age of 50.

388

### 389 **Belief segments for eliminating Covid-19**

390 Respondents were classified into four belief segments with respect to eliminating Covid-19  
391 (Table 5). Most respondents had beliefs that align with seeking to eliminate Covid-19 from  
392 New Zealand. These respondents were classified as ‘elimination enthusiasts’ (23%) and  
393 ‘elimination moderates’ (40%), the difference between these two segments being the intensity  
394 of their beliefs. Another segment of respondents, the ‘vaccination hopefuls’ (27%), agreed  
395 with trying to eliminate Covid-19 but were less sure that Covid-19 could be kept out of New  
396 Zealand indefinitely. They believed we must live with Covid-19 until a vaccine is available.  
397 A fourth segment, the ‘elimination sceptics’ (10%), consisted of respondents who believed  
398 we cannot eliminate Covid-19 indefinitely and we should try to build herd immunity.

399

400 A relatively high proportion of respondents in the ‘elimination enthusiasts’ and ‘elimination  
401 moderates’ segments were over the age of 50. A relatively high proportion of respondents in  
402 the ‘elimination enthusiasts’ and ‘elimination moderates’ segments were also European New  
403 Zealanders.

404

405 Table 5. Belief segments for eliminating Covid-19<sup>1</sup>

| Statement                                                                                   | Elimination enthusiasts (23%) | Elimination moderates (40%) | Vaccine hopefuls (27%) | Elimination sceptics (10%) |
|---------------------------------------------------------------------------------------------|-------------------------------|-----------------------------|------------------------|----------------------------|
| We need to eliminate Covid-19 to save lives                                                 | 4.63                          | 4.1                         | 3.56                   | 3.2                        |
| We should just live with it until we have a vaccine                                         | 1.67                          | 2.64                        | 3.61                   | 4.3                        |
| It would be better to let it spread and build herd immunity                                 | 1.38                          | 1.84                        | 2.57                   | 4.24                       |
| There is no point trying to eliminate Covid-19 because it is a virus and will keep changing | 1.7                           | 2.56                        | 3.3                    | 4.38                       |
| Covid-19 is everywhere in the world so there is no way we can keep it out                   | 1.75                          | 3.05                        | 4.00                   | 4.44                       |

406

407 Notes: Values are mean agreement ratings. Ratings ranged from a minimum of 1 (strongly disagree) to a maximum of 5 (strongly agree).

408 <sup>1</sup> Mean agreement ratings on all statements were statistically significant different across segments ( $p < 0.01$ ).

409 A relatively high proportion of respondents in the ‘vaccine hopefuls’ and ‘elimination  
410 sceptics’ segments were in the 30–39 years age group and had a graduate or postgraduate  
411 qualification. Men were more likely than women to express strong views in the sense of  
412 being members of either the ‘elimination enthusiasts’ or the ‘elimination sceptics’ segments.

413

### 414 **Wearing face masks and mask belief segments**

415 Respondents were classified into four belief segments with respect to wearing face masks  
416 (Table 6). Most respondents believed that wearing face masks was effective in helping  
417 eliminate Covid-19 from New Zealand. These respondents were classified as ‘mask  
418 enthusiasts’ (45%) and ‘mask moderates’ (21%), the difference between these two segments  
419 being the intensity of their beliefs.

420

421 Another segment of respondents, the ‘mask ambivalents’ (27%), agreed masks could be  
422 effective but were less sure about the need to wear masks if you were young and healthy, and  
423 the usefulness of masks on their own, and doubted the effectiveness of masks that were  
424 home-made or available for purchase by the public. A fourth segment consisted of  
425 respondents, the ‘mask sceptics’ (7%), who were not convinced masks were effective. These  
426 respondents believed you were over-reacting if you wore a mask unless you were elderly or  
427 had a health problem. They also believed that masks were of limited usefulness on their own  
428 and doubted the quality of masks that were home-made or could be purchased by the public.

429

430 A relatively high proportion of respondents in the ‘mask enthusiasts’ and ‘mask moderates’  
431 segments were over the age of 50, while a relatively high proportion of respondents in the  
432 ‘mask ambivalents’ and ‘mask sceptics’ segments were in the 30–39 years age group.

433

434 Table 6. Belief segments for wearing masks<sup>1</sup>

| Statement                                                                   | Mask enthusiasts<br>(45%) | Mask moderates<br>(21%) | Mask ambivalents<br>(27%) | Mask sceptics<br>(7%) |
|-----------------------------------------------------------------------------|---------------------------|-------------------------|---------------------------|-----------------------|
| Masks are effective                                                         | 4.48                      | 3.78                    | 3.34                      | 3.24                  |
| Wearing masks should be compulsory                                          | 4.04                      | 3.53                    | 2.8                       | 2.9                   |
| Wearing a mask sets a good example to others                                | 4.52                      | 4.09                    | 3.41                      | 3.34                  |
| You should only have to wear a mask if you feel unwell                      | 1.5                       | 1.96                    | 3.39                      | 4.24                  |
| You should only have to wear a mask if you are old or have a health problem | 1.5                       | 1.78                    | 3.05                      | 4.06                  |
| People who wear masks are over-reacting                                     | 1.39                      | 1.99                    | 2.85                      | 4.28                  |
| Masks are not practical                                                     | 1.53                      | 2.22                    | 3.1                       | 4.26                  |
| Home-made masks are a waste of time and effort                              | 1.77                      | 2.5                     | 2.96                      | 4.56                  |
| Masks are just too uncomfortable                                            | 2.18                      | 2.99                    | 3.41                      | 4.14                  |
| Masks we can buy are not worth bothering with                               | 1.93                      | 2.53                    | 3.13                      | 4.38                  |
| Masks are too difficult if you wear glasses                                 | 2.36                      | 3.35                    | 3.49                      | 4.16                  |
| Masks are not much help without gloves                                      | 2.02                      | 2.66                    | 3.1                       | 3.7                   |
| Masks on their own are not much help                                        | 2.13                      | 3.13                    | 3.28                      | 4.24                  |
| Masks are not much help because they are not worn properly                  | 2.43                      | 2.98                    | 3.49                      | 4.42                  |

435 Notes: Values are mean agreement ratings. Ratings ranged from a minimum of 1 (strongly disagree) to a maximum of 5 (strongly agree).

436 <sup>1</sup>Mean agreement ratings on all statements were statistically significant different across segments ( $p < 0.01$ ).

### 437 **Self-isolating when unwell and self-isolation belief segments**

438 Respondents were classified into three belief segments with respect to self-isolating (Table  
439 7). Most respondents believed that self-isolating, if you felt unwell or had any of the  
440 symptoms associated with Covid-19, was effective in helping eliminate Covid-19 from New  
441 Zealand. These respondents were classified as ‘self-isolation enthusiasts’ (60%). Another  
442 large group of respondents, the ‘self-isolation ambivalents’ (29%), also believed that self-  
443 isolating was effective in helping eliminate Covid-19 but were unsure about the practicalities  
444 of it.

445

446 A third, smaller, segment consisted of the ‘self-isolation doubtfuls’ (11%), who believed self-  
447 isolating was effective in preventing the spread of Covid-19 but did not believe it was  
448 practical and would most likely be a waste of their time. These respondents believed that they  
449 could not afford the time off work to self-isolate and that you should only have to self-isolate  
450 if you were old, already had a health problem, or had all the right symptoms. They also  
451 believed that staying at home if you were unwell was not much help if you didn’t get tested.

452

453 A relatively high proportion of respondents in the ‘self-isolation doubtfuls’ segment were in  
454 the 30–39 years age group. A relatively low proportion of respondents in this segment were  
455 European New Zealanders.

456

457 Table 7. Belief segments for self-isolating<sup>1</sup>

| Statement                                                                            | Isolation enthusiasts<br>(60%) | Isolation ambivalents<br>(29%) | Isolation doubtfuls<br>(11%) |
|--------------------------------------------------------------------------------------|--------------------------------|--------------------------------|------------------------------|
| Staying at home if you are unwell is effective in preventing the spread of Covid-19  | 4.4                            | 3.91                           | 3.95                         |
| Staying at home if you feel unwell is just not practical                             | 1.78                           | 2.56                           | 3.82                         |
| I think staying at home if you feel unwell would be depressing                       | 2.19                           | 2.92                           | 3.96                         |
| I couldn't afford the time off work to stay home if I was unwell                     | 2.2                            | 3                              | 4.1                          |
| You should only stay home if you have all the right symptoms                         | 2.16                           | 3.18                           | 4.04                         |
| You should only have to stay at home if you are old or already have a health problem | 1.52                           | 2.71                           | 3.92                         |
| Staying home if you are unwell is not much help if you don't get tested              | 2.63                           | 3.14                           | 4.01                         |
| Staying at home if you feel unwell is a waste of time and effort                     | 1.42                           | 2.25                           | 3.88                         |

458

459 Notes: Values are mean agreement ratings. Ratings ranged from a minimum of 1 (strongly disagree) to a maximum of 5 (strongly agree).

460 <sup>1</sup> Mean agreement ratings on all statements were statistically significant different across segments ( $p < 0.01$ ).



## 461 **Covid-19 testing and testing belief segments**

462 Respondents were classified into four belief segments with respect to testing for Covid-19  
463 (Table 8). Nearly all respondents believed that testing for Covid-19 was effective in helping  
464 eliminate Covid-19 from New Zealand. However, respondents differed in their beliefs about  
465 the efficacy of tests and who should be tested.

466

467 Most respondents believed that testing was practical and reliable, and should include the  
468 healthy as well as the elderly, people with health problems or people with Covid-19  
469 symptoms. These respondents were classified as ‘testing enthusiasts’ (12%) and ‘testing  
470 moderates’ (59%), the difference between these two segments being the intensity of their  
471 beliefs.

472

473 Another segment of respondents, the ‘testing selectives’ (12%), were like the ‘testing  
474 enthusiasts’ in believing that testing was practical and reliable, but they believed testing could  
475 be limited to sick people. A fourth segment, the ‘testing doubters’ (18%), consisted of  
476 respondents who believed testing was effective in preventing the spread of Covid-19, but did  
477 not believe it was practical or reliable, and that testing should be limited to the elderly, people  
478 with health problems and people with Covid-19 symptoms.

479

480 Compared to the other testing segments, a relatively high proportion of ‘testing enthusiasts’  
481 indicated they had been tested for Covid-19. There were no differences among the segments  
482 in the proportion of respondents who had been tested in each segment and who had felt  
483 unwell when they were tested.

484 Table 8. Belief segments for Covid-19 testing<sup>1</sup>

| Statement                                                          | Testing enthusiasts<br>(12%) | Testing moderates<br>(59%) | Testing selectives<br>(12%) | Testing doubters<br>(18%) |
|--------------------------------------------------------------------|------------------------------|----------------------------|-----------------------------|---------------------------|
| Testing people is effective in preventing the spread of Covid-19   | 4.77                         | 3.95                       | 4.86                        | 3.4                       |
| You should only get tested if you have the right symptoms          | 1.56                         | 3.17                       | 2.29                        | 3.57                      |
| Testing is not much help if you only test sick people              | 4.22                         | 3.16                       | 1.59                        | 3.45                      |
| You should only get tested if you are old or have a health problem | 1.15                         | 2.11                       | 1.13                        | 3.37                      |
| The tests for Covid-19 are too unreliable                          | 1.51                         | 2.25                       | 1.34                        | 3.53                      |
| Testing is painful and uncomfortable                               | 2.86                         | 3.06                       | 2.43                        | 3.38                      |
| Testing people is just not practical                               | 1.17                         | 2.16                       | 1.41                        | 3.51                      |
| Testing takes so long it's not worth bothering with                | 1.1                          | 2.04                       | 1.29                        | 3.48                      |
| Getting tested is a waste of time and effort                       | 1.05                         | 1.84                       | 1.1                         | 3.32                      |

485 Notes: Values are mean agreement ratings. Ratings ranged from a minimum of 1 (strongly disagree) to a maximum of 5 (strongly agree).

486 <sup>1</sup> Mean agreement ratings on all statements were statistically significant different across segments ( $p < 0.01$ ).

487

488 Assuming the probability of exposure to Covid-19 and the probability of ‘feeling unwell’ is  
489 similar across the segments, one explanation for this result is that respondents in this segment  
490 are more likely than those in other segments to seek testing, whether they are well or unwell.

491

492 A relatively high proportion of respondents in the ‘testing enthusiasts’ and ‘testing selectives’  
493 segments were over 50 years old. A relatively high proportion of respondents in these  
494 segments were women and European New Zealanders. A relatively high proportion of  
495 respondents in the ‘testing enthusiasts’ segment had higher incomes and believed they could  
496 afford the time off work to self-isolate if they tested positive to Covid-19.

497

498 A relatively high proportion of respondents in the ‘testing moderates’ and ‘testing doubters’  
499 segment were under 50 years old. A relatively high proportion of respondents in this segment  
500 were men and were Māori, Pacific Islanders, or from another non-European ethnic group. A  
501 relatively high proportion of respondents in the ‘testing doubters’ segment had lower incomes  
502 and believed they could not afford the time off work to self-isolate if they tested positive to  
503 Covid-19.

504

505 A relatively high proportion of Māori and Pacific Islander respondents in the sample had  
506 been tested for Covid-19, while a relatively low proportion of respondents from other ethnic  
507 groups, including European New Zealanders, had been tested. A relatively high proportion of  
508 respondents who were European New Zealanders who had been tested were unwell at the  
509 time of testing, while a relatively low proportion of respondents who were Māori or Pacific  
510 Islanders were unwell when tested.

511

512 There were no other socio-demographic differences between respondents in the sample who  
513 had been tested for Covid-19 and those who had not (Kaine, 2020).

514

## 515 **Predicting compliance**

516 The purpose of this analysis was to quantify the effect of beliefs, attitudes, and involvement  
517 on respondents' propensity to comply with wearing face masks in public, self-isolating and  
518 being tested for Covid-19. In other words, we wanted to estimate, separately, the influence of  
519 involvement (as a measure of the strength of individuals' motivation) on compliance and the  
520 influence of beliefs and attitudes in the context of eliminating Covid-19 from New Zealand  
521 by wearing masks, self-isolating when unwell and being tested.

522

523 We hypothesised that the propensity to wear face masks, self-isolate when unwell and get  
524 tested for Covid-19 was a function of involvement and attitude, as outlined by Kaine et al.  
525 (2010). We also hypothesised that the marginal effect of an increase in involvement with the  
526 outcome (eliminating Covid-19) would decrease with higher levels of involvement with the  
527 measure (e.g. wearing face masks). The same would apply with respect to the marginal effect  
528 of an increase in involvement with the measure (e.g. wearing face masks), which would  
529 decrease with higher levels of involvement with the outcome (eliminating Covid-19). In  
530 addition, we hypothesised that attitudes towards mask wearing, self-isolating when unwell  
531 and testing were a function of beliefs about Covid-19, eliminating Covid-19, mask wearing,  
532 self-isolating and testing.

533

534 To summarise, two sets of regressions were estimated. One set had propensity to comply as  
535 the dependent variable (e.g. wear face masks), with involvement with the outcome  
536 (eliminating Covid-19), involvement with the measure (e.g. wearing masks), the interaction

537 between the involvement with the outcome and the measure, and attitudes towards the  
538 measure as the explanatory variables.

539

540 The second set had attitudes towards the measures (wearing face masks, self-isolating and  
541 testing) as the dependent variables, with beliefs about Covid-19, eliminating Covid-19, and  
542 beliefs about the measures (mask wearing, self-isolating when unwell and testing  
543 respectively) as the explanatory variables.

544

545 Respondents' propensity to wear face masks was obtained by asking them if they had worn a  
546 face mask when out in public the previous week and if they had to go out to work the  
547 previous week. Respondents answered both questions using a five-point scale ranging from  
548 'always' to 'never'. Their propensity to self-isolate was obtained by asking them, 'Thinking  
549 about the next few days, would you stay home if you were unwell or had any of the following  
550 symptoms: a dry cough, fever, loss of sense of smell, loss of sense of taste, shortness of  
551 breath or difficulty breathing?'. We also asked, 'If you were advised to do so by a health care  
552 professional or public health authority, would you self-isolate for 14 days?'. Both questions  
553 were answered using a five-point scale ranging from 'definitely' to 'definitely not'.

554

555 Regarding testing, the propensity to be tested will depend on their perceptions of the risk of  
556 exposure to Covid-19 and whether they had experienced symptoms associated with Covid-19,  
557 as well as their involvement with, and attitudes towards, testing. We had data indicating  
558 whether respondents had been tested for Covid-19 and, if they had, whether they were feeling  
559 unwell at the time. However, we did not have data indicating whether any respondents had  
560 felt unwell but had not sought Covid-19 testing. Nor did we have data on respondent's

561 perceptions of exposure to Covid-19 such as their proximity to sources of outbreaks.

562 Consequently we were unable to estimate satisfactory regressions for being tested.

563

564 Dummy variables were created representing respondents' membership of belief segments

565 with respect to Covid-19, eliminating Covid-19, mask wearing, self-isolating when unwell,

566 and being tested. In each instance, 'enthusiasts' were treated as the benchmark. Attitudes

567 towards the policy measures were included using the evaluative scale described earlier.

568

569 The explanatory power of the regressions, and the resulting parameter estimates, are reported

570 in Tables 9 and 10. The compliance regressions were statistically significant and, for cross-

571 sectional data, a substantial proportion of the variance in respondents' compliance was

572 explained by their involvement and attitudes (apart from the regression for staying at home if

573 feeling unwell).

574

575 The attitudinal regressions were statistically significant and, for cross-sectional data, a

576 substantial proportion of the variance in the attitudes of respondents was explained by their

577 beliefs.

578

579 Willingness to wear face masks in public and at work was strongly and positively influenced

580 by involvement with eliminating Covid-19 as well as involvement with, and attitudes

581 towards, wearing face masks. Willingness to self-isolate when unwell was also strongly and

582 positively influenced by involvement with eliminating Covid-19 as well as involvement with,

583 and attitudes towards, self-isolating.

584 Table 9. Parameter estimates for propensity to wear face masks and self-isolate

|                                       | Wear face mask in public | Wear face mask at work | Stay home if unwell | Stay home if instructed |
|---------------------------------------|--------------------------|------------------------|---------------------|-------------------------|
| Involvement with eliminating Covid-19 | 0.63**                   | 0.41                   | 1.43**              | 0.83**                  |
| Involvement with wearing face masks   | 1.66**                   | 1.68**                 |                     |                         |
| Involvement with self-isolating       |                          |                        | 1.57**              | 0.73**                  |
| Involvement with testing              |                          |                        |                     |                         |
| Attitude towards face masks           | 0.73**                   | 0.60**                 |                     |                         |
| Attitude towards self-isolating       |                          |                        | 0.42**              | 0.40**                  |
| Attitude towards testing              |                          |                        |                     |                         |
| Feeling unwell when tested            |                          |                        |                     |                         |
| Involvement interaction <sup>1</sup>  | -0.28**                  | -0.23*                 | -0.37**             | -0.19**                 |
| Intercept                             | -3.44**                  | -3.17                  | -3.25*              | -0.22                   |
| Adjusted R <sup>2</sup>               | 0.45                     | 0.27                   | 0.15                | 0.21                    |
| F-Test significance                   | <0.01                    | <0.01                  | <0.01               | <0.01                   |

585 Notes: \*\* indicates statistically significant  $p < 0.01$ , \* indicates statistically significant  $p < 0.05$ .

586 <sup>1</sup>Interaction between involvement with Covid-19 and involvement either with wearing masks or with self-isolating.

587 **Table 10. Parameter estimates for attitude towards wearing face masks, self-isolating and seeking**  
 588 **testing**

|                         | Attitude towards face masks | Attitude towards self-isolating | Attitude towards testing |
|-------------------------|-----------------------------|---------------------------------|--------------------------|
| Covid-19 moderate       | -0.19**                     | -0.11*                          | -0.21**                  |
| Covid-19 ambivalent     | -0.31**                     | -0.15*                          | -0.31**                  |
| Covid-19 healthy        | -0.17*                      | -0.06                           | -0.03                    |
| Covid-19 sceptic        | -0.33**                     | -0.38**                         | -0.31**                  |
| Elimination moderate    | 0.05                        | -0.04                           | -0.03                    |
| Elimination hopeful     | -0.08                       | -0.05                           | -0.05                    |
| Elimination sceptic     | 0.06                        | 0.10                            | 0.10                     |
| Mask moderate           | -0.39**                     |                                 |                          |
| Mask ambivalent         | -1.13**                     |                                 |                          |
| Mask sceptic            | -1.53**                     |                                 |                          |
| Isolation ambivalent    |                             | -0.46**                         |                          |
| Isolation doubter       |                             | -0.85**                         |                          |
| Test selectives         |                             |                                 | 0.00                     |
| Test moderates          |                             |                                 | -0.56**                  |
| Test doubters           |                             |                                 | -1.26**                  |
| Intercept               | 4.72**                      | 4.73**                          | 4.84**                   |
| R                       | 0.75                        | 0.55                            | 0.67                     |
| Adjusted R <sup>2</sup> | 0.55                        | 0.30                            | 0.45                     |
| F-Test significance     | <0.01                       | <0.01                           | <0.01                    |

589 Notes: \* indicates statistically significant  $p < 0.05$ .

590 \*\* indicates statistically significant  $p < 0.01$ .



591 As hypothesised, the marginal impact of an increase in involvement with wearing face masks  
592 or self-isolating when unwell decreased with higher levels of involvement with eliminating  
593 Covid-19 (and vice versa). Overall, the results reported in Table 9 support the idea that  
594 involvement and attitudes have differential effects on compliance.

595

596 Respondents' attitudes towards wearing face masks were influenced by their beliefs about  
597 Covid-19 and about the effectiveness of wearing face masks (see Table 10). Similarly, their  
598 attitudes towards self-isolating when unwell were influenced by their beliefs about Covid-19  
599 together with their beliefs about the effectiveness of self-isolating. Lastly, their attitudes  
600 towards testing were influenced by their beliefs about Covid-19 together with their beliefs  
601 about the effectiveness of testing. Respondents' beliefs about the effectiveness of eliminating  
602 Covid-19 as a strategy did not appear to have a significant influence on attitudes to any of the  
603 measures. In all instances the signs on the estimated parameters were consistent with  
604 expectations with attitudes becoming more and more unfavourable as respondents' beliefs  
605 shifted towards scepticism.

606

## 607 **Discussion**

608 Kaine et al. (2010) proposed that the propensity of individuals to change their behaviour and  
609 comply with policy measure depends on the intensity of their involvement with the policy  
610 outcome and policy measure, as well as their attitude towards the policy measure. The results  
611 presented here largely support that proposition: they clearly indicate that involvement (how  
612 much an individual cares about a subject) influences the propensity to comply with measures  
613 to prevent the spread of Covid-19 in addition to their attitude towards those measures. The  
614 prosaic but important implication is that people may hold similar opinions or attitudes

615 towards a protocol such as wearing face masks in public, but their propensity to do so may  
616 vary markedly depending on how involved they are – how much they care about – preventing  
617 the spread of Covid-19 and wearing face masks.

618

619 Of course, the influence of involvement becomes unimportant in explaining differences in  
620 compliance if everyone has a similar level of involvement, as appears to be the case with self-  
621 isolating when unwell. In these circumstances, individual differences in attitudes and  
622 constraints on behaviour, such as the capacity to absorb salary losses, are the determinants of  
623 compliance.

624

625 Our findings have three important implications for promoting community compliance with  
626 measures intended to prevent the spread of Covid-19 in particular, and the design of policy  
627 measures generally. The first is that people may, inadvertently, fail to comply with the  
628 measure even though they may have favourable attitudes towards the policy outcome, simply  
629 because they are not paying attention. In circumstances where involvement is low,  
630 compliance (or non-compliance) is not a matter of deliberate choice. Consequently,  
631 authorities must consider carefully imposing blanket penalties for non-compliance, because  
632 they run the risk of alienating people who would otherwise do the 'right thing'.

633

634 In the context of Covid-19 measures this translates into ensuring that compliance requires as  
635 little effort and thought as possible; for example, by supplying face masks for free on public  
636 transport and other high-risk locations such as supermarkets, by ensuring testing is as  
637 convenient as possible, by minimising as far as practical the time spent travelling to testing  
638 centres and the time spent queuing for tests, and by offering limited compensation for those  
639 who are required to self-isolate because they test positive.

640 In these circumstances, where involvement is high, compliance (or non-compliance) is most  
641 likely to be a deliberate choice, the choice depending on one's attitude towards the wearing of  
642 face masks, self-isolating when unwell, and testing. If attitudes are strongly unfavourable,  
643 then severe penalties or substantial inducements may be required to secure compliance, or  
644 compliance could be imposed (for example, compelling employers to report staff with Covid-  
645 19 symptoms to health authorities).

646

647 Clearly, differences in the level of involvement people have with the outcome of eliminating  
648 Covid-19 and the measures for preventing the spread of Covid-19 create an additional  
649 complication for authorities responsible for implementing the strategy. Tactics to promote  
650 compliance among those with low involvement will not influence the highly involved who  
651 are non-compliant, unless the latter can be rapidly and easily distinguished from the former.

652

653 The second implication is that people who have low involvement with the policy outcome  
654 and the policy measures may miss important promotional messages simply because they are  
655 not paying attention. In circumstances where involvement with a subject is low, sensitivity to  
656 promotional messages about the subject is low. Messages are not necessarily deliberately  
657 ignored; they simply fail to catch the attention of those with low involvement (they are not  
658 noticed).

659

660 In the context of Covid-19 measures, this means that people with low-to-mild involvement  
661 with eliminating Covid-19 and with the measures for preventing the spread of Covid-19 may  
662 fail to notice or properly process promotional messages about Covid-19 and the measures.  
663 They may, for example, be entirely unaware of lockdown rules (or even what level of  
664 lockdown is in play). This increases the risk that people with low involvement may

665 inadvertently be non-compliant, especially if changes are made to lockdown rules, or new  
666 lockdown levels are introduced.

667

668 The attention of people with low involvement in a subject can be captured if messages about  
669 the subject can be linked to another matter that is involving for them. This requires  
670 identifying, for those not interested in Covid-19, themes that are involving for them, and that  
671 can be meaningfully linked to containing the spread of Covid-19. The sport metaphor ‘[We  
672 are] a team of five million’, employed in community messaging about Covid-19 by the New  
673 Zealand government, is one example, though this metaphor may not be universally appealing.  
674 Other examples may be framing messages about following Covid-19 measures in the context  
675 of protecting families and jobs (Wilson, 2020).

676

677 The third implication concerns the intrinsic malleability of the beliefs and attitudes of people  
678 who have low involvement with a subject. Such people devote little time and effort to  
679 gathering information about the subject, evaluating that information, and forming beliefs  
680 about and attitudes towards the subject. This means their beliefs and attitudes may be  
681 unstable and can change rapidly.

682

683 With respect to preventing the spread of Covid-19, this raises the possibility that, on the one  
684 hand, the distribution of misinformation through social media may provoke changes in the  
685 beliefs and attitudes of people with low involvement in Covid-19 that are undesirable because  
686 they undermine compliance with Covid-19 measures (Bridgman et al., 2020; Imhoff and  
687 Lamberty, 2020). Such misinformation may provide a self-serving rationale for failing to  
688 comply with measures that require an investment of time and effort. On the other hand,  
689 people with low involvement are unlikely to strongly endorse misinformation (unless it is

690 framed within a context they find highly involving) and so are unlikely to be provoked into  
691 engaging in non-compliant behaviours that require an investment of time and effort (such as  
692 attending protest rallies).

693

694 These considerations suggest that government authorities must be careful to discriminate  
695 between audiences on social media in terms of involvement when it comes to investing  
696 resources in combating misinformation about Covid-19. Presumably, those with low  
697 involvement in eliminating Covid-19 will exhibit a lower intensity and pattern of engagement  
698 with misinformation on social media than those with high involvement.

699

## 700 **Conclusions**

701 Governments around the world are seeking to slow the spread of Covid-19 by implementing  
702 measures that encourage, or mandate, changes in people's behaviour. These changes include  
703 the wearing of face masks, social distancing, and testing and self-isolating when unwell. The  
704 success of these measures depends on the commitment of individuals to change their  
705 behaviour accordingly. Understanding and predicting the motivation of individuals to change  
706 their behaviour is critical to assessing the likely effectiveness of these measures in slowing  
707 the spread of the virus.

708

709 Kaine et al. (2010) hypothesised that the propensity of individuals to change their behaviour  
710 and comply with policy measures depends on the intensity of their involvement with, and  
711 their attitude towards, the measure. This is because cognitive effort is required to form a  
712 strongly held attitude, and such effort is only invested when the matter at hand is sufficiently  
713 important to the individual. They also hypothesised that the propensity of individuals to

714 comply with policy measures also depends on their involvement with the policy outcome the  
715 measure addresses. An implication of these hypotheses is that individuals with similar  
716 attitudes will display varying degrees of compliance with policy measures depending on the  
717 intensity of their involvement with the policy outcome and the policy measure.

718

719 We tested these hypotheses, and their implication, using compliance with measures to prevent  
720 the spread of Covid-19 in New Zealand. Broadly speaking the hypotheses and their  
721 implication are supported by the results. The finding that compliance depends on  
722 involvement (motivation) as well as attitude has important implications for the design of  
723 policy measures intended to promote compliance. This finding also has important  
724 implications for the design of promotional programmes to communicate information to the  
725 community about policy measures intended to promote compliance.

726

727 With respect to preventing the spread of Covid-19 in New Zealand, the results highlight the  
728 importance of distinguishing unintentional non-compliance with respect to wearing face  
729 masks, self-isolating when unwell, and testing from deliberate non-compliance, and tailoring  
730 enforcement strategies appropriately. The results also highlight the difficulty of  
731 communicating effectively through mass media with those who have low involvement with  
732 preventing the spread of Covid-19, and the importance of distinguishing between those with  
733 low and high involvement in considering the possible effects on compliance of the  
734 dissemination of misinformation about Covid-19 through social media.

735

736

## 737 **Acknowledgements**

738 This paper is based on work funded by the Ministry of Business, Innovation, and  
739 Employment's strategic investment funding for Landcare Research NZ Ltd. We would  
740 sincerely like to thank the residents of Auckland who completed the questionnaire.

741

## 742 **References**

- 743 1. Czeisler ME, Tynan MA, Howard ME, Honeycutt S, Fulmer EB, Kidder DP, et al, Public  
744 attitudes, behaviors, and beliefs related to COVID-19, stay-at-home orders,  
745 nonessential business closures, and public health guidance – United States, New York  
746 City, and Los Angeles, May 5-12, 2020. *Morbidity and Mortality Weekly Report*. 2020;  
747 69(24): 751-758. [doi.org/10.15585/mmwr.mm6924e1](https://doi.org/10.15585/mmwr.mm6924e1)
- 748 2. Hager E, Odetokun IA, Bolarinwa O, Zainab A, Okechukwu O, Al-Mustapha AI,  
749 Knowledge, attitude, and perceptions towards the 2019 Coronavirus Pandemic: A bi-  
750 national survey in Africa. *PLoS ONE*, 2020; 15(7): e0236918.  
751 [doi.org/10.1371/journal.pone.0236918](https://doi.org/10.1371/journal.pone.0236918)
- 752 3. Jarynowski A, Wójta-Kempa M, Piatek D, Czopek K, Attempt to understand public health  
753 relevant social dimensions of COVID-19 outbreak in Poland (5 April 2020). Available  
754 at SSRN: <https://ssrn.com/abstract=3570609>
- 755 4. Burby RJ, Paterson RG, Improving compliance with state environmental regulations. *J.*  
756 *Policy Anal. Manage.* 1993; 12: 753-772.
- 757 5. Daoust J.-F, 2020. Elderly people and responses to COVID-19 in 27 Countries. *PLoS ONE*  
758 15(7): e0235590. <https://doi.org/10.1371/journal.pone.0235590>
- 759 6. Kaine G, Murdoch H, Lourey R, Bewsell D, A framework for understanding individual  
760 response to regulation. *Food Policy* 2010; 35: 531–537.

- 761 7. Kim Y, Conceptualizing health campaign strategies through the level of involvement.  
762 Corp. Commun. Int. J. 2003; 8: 255-267.
- 763 8. Zaichkowsky JL, Measuring the involvement construct. J. Consum. Res. 1985; 12: 341-  
764 352.
- 765 9. Ajzen I, Fishbein M, Attitude-behaviour relations: A theoretical analysis and review of  
766 empirical research. Psychol. Bull. 1977; 84: 888-918.
- 767 10. Kassirjian HH, Low involvement: A second look, in: Monroe KB. (Ed.), Advances in  
768 Consumer Research. Association for Consumer Research, 1981; 31-34.
- 769 11. Murdoch H, Bewsell D, Lourey R, Kaine G, Understanding people's response to  
770 biosecurity regulation. Decision Making in Uncertain Times, 3rd National Conference  
771 on Risk Management. The New Zealand Society for Risk Management Inc, Auckland,  
772 2006.
- 773 12. Chaffee SH, Roser C, Involvement and the consistency of knowledge, attitudes, and  
774 behaviours. Commun. Res. 1986; 13: 373-399.
- 775 13. Petty RE, Cacioppo JT, The Effects of Involvement on Responses to Argument Quantity  
776 and Quality: Central and Peripheral Routes to Persuasion. J. Pers. Soc. Psychol. 1984;  
777 46: 69-81.
- 778 14. Thaler R.H, Sunstein CR, Nudge: improving decisions about health, wealth, and  
779 happiness. New Haven, CT: Yale University Press; 2008.
- 780 15. Gunningham N, Grabosky P, Sinclair D, Smart regulation: Designing environmental  
781 policy. Oxford University Press, New York; 1998.
- 782 16. Davies A, Kaine G, Lourey R, Understanding factors leading to non-compliance with  
783 effluent regulations by dairy farmers. Environment Waikato Technical Report 2007/37,  
784 Environment Waikato, Hamilton; 2007.



- 785 17. Carlough L, General deterrence of environmental violation: A peek into the mind of the  
786 regulated public. Oregon Department of Environmental Quality. 2003. Available at  
787 <http://www.deq.state.or.us/programs/enforcement> [accessed June 6 2008].
- 788 18. Kaine G, Tostovrsnik N, Landholders and the management of weeds: Blackberry and  
789 serrated tussock. Service Design Research Working Paper 03-11, Department of  
790 Primary Industries, Tatura, Victoria; 2011.
- 791 19. Lourey R, Kaine G, Davies A, Young J, Landholder responses to incentives for wild dog  
792 control. Service Design Research Working Paper 07-11. Department of Primary  
793 Industries, Tatura, Victoria; 2011.
- 794 20. Kaine G, An application of the I<sub>3</sub> framework to rat control in Hawke's Bay. Landcare  
795 Research Contract Report LC3646; 2019.
- 796 21. Kaine G, Kirk N, Householders' interest in urban possum control in Dunedin. Landcare  
797 Research Report LC3744; 2020.
- 798 22. Kaine G, Stronge D, An application of the I<sub>3</sub> framework to rat control in New Plymouth.  
799 Landcare Research Report LC3734; 2020.
- 800 23. Kaine G, Kannemeyer R, Stronge D, Using 1080 to control possums and rats: An  
801 application of the I<sub>3</sub> framework. Landcare Research Report LC3747; 2020.
- 802 24. New Zealand Government, History of the COVID-19 alert system; 2021.  
803 <https://covid19.govt.nz/alert-system/history-of-the-covid-19-alert-system/>
- 804 25. Travica B, Containment strategies for COVID-19 pandemic 2020; Available at SSRN:  
805 <https://ssrn.com/abstract=3604519> or <http://dx.doi.org/10.2139/ssrn.3604519>
- 806 26. Ministry of Health, 2021. [https://www.health.govt.nz/our-work/diseases-and-](https://www.health.govt.nz/our-work/diseases-and-conditions/covid-19-novel-coronavirus/covid-19-response-planning/covid-19-elimination-strategy-aotearoa-new-zealand)  
807 [conditions/covid-19-novel-coronavirus/covid-19-response-planning/covid-19-](https://www.health.govt.nz/our-work/diseases-and-conditions/covid-19-novel-coronavirus/covid-19-response-planning/covid-19-elimination-strategy-aotearoa-new-zealand)  
808 [elimination-strategy-aotearoa-new-zealand](https://www.health.govt.nz/our-work/diseases-and-conditions/covid-19-novel-coronavirus/covid-19-response-planning/covid-19-elimination-strategy-aotearoa-new-zealand)

- 809 27. Laurent G, Kapferer J.-N, Measuring consumer involvement profiles. *J. Mark. Res.*  
810 1985; 22: 41-53.
- 811 28. Kaine G, A pilot application of the I<sub>3</sub> framework to compliance behaviour in farming.  
812 Landcare Research Contract Report LC3513; 2019.
- 813 29. Olsen SO, Strength and conflicting valence in measurement of food attitudes and  
814 preferences. *Food Quality and Preferences* 1999; 10: 483–494.
- 815 30. Aldenderfer MS, Blashfield RK, Cluster analysis. Sage, Newbury Park, California; 1984.
- 816 31. Kaine G, Willingness to wear masks, self-isolate and test for Covid-19 and implications  
817 for compliance. Landcare Research Contract Report LC3867; 2020.
- 818 32. Wilson S, Pandemic leadership: Lessons from New Zealand’s approach to COVID-19.  
819 *Leadership* 2020; 16: 279-293. (doi:10.1177/1742715020929151)
- 820 33. Bridgman A, Merkley E, Loewen PJ, Owen T, Ruths D, Teichmann L, et al, The causes  
821 and consequences of COVID-19 misperceptions: Understanding the role of news and  
822 social media. *The Harvard Kennedy School (HKS) Misinformation Review*, 2020; 1:  
823 Special Issue on COVID-19 and Misinformation.
- 824 34. Imhoff R, Lamberty P, A bioweapon or a hoax? The link between distinct conspiracy  
825 beliefs about the Coronavirus disease (COVID-19) outbreak and pandemic behavior.  
826 2020. <https://doi.org/10.1177/1948550620934692>

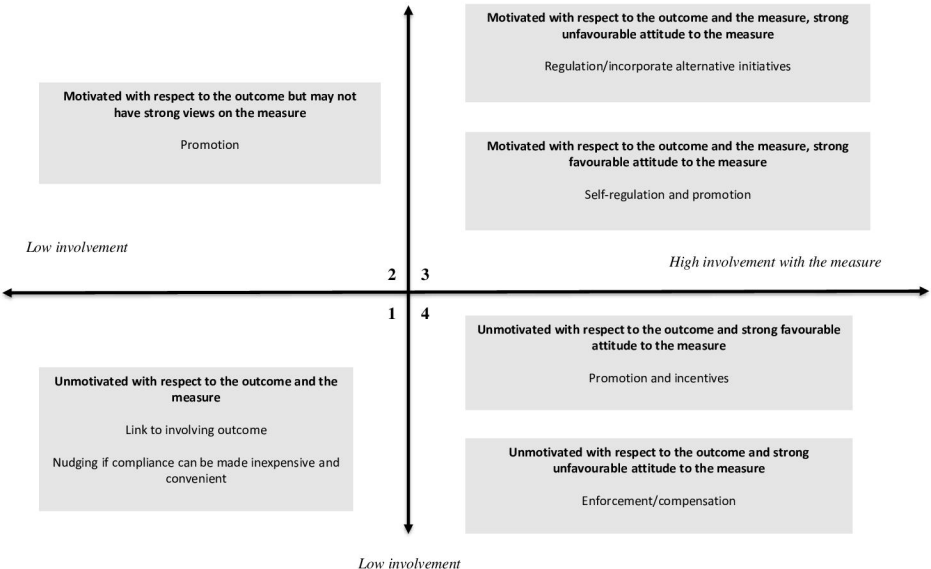

Source: https://www.medrxiv.org/content/10.1101/2021.04.08.21255157v1.full.pdf
