# Supplementary material for: Compliance with Covid-19 measures: evidence from New Zealand
Source: bioRxiv or medRxiv preprint supplement (doi:10.1101/2021.04.08.21255157), 2021-10-25
Supplement: Supplementary file [file media-1.pdf]

## Appendix. Summary of sample demographics

**Table A1. Age distribution of respondents**

| Age category      | Proportion of respondents | Proportion of Auckland residents <sup>1</sup> |
|-------------------|---------------------------|-----------------------------------------------|
| 18-29 years       | 22.8                      | 22.4                                          |
| 30-39 years       | 21.8                      | 20.3                                          |
| 40-49 years       | 18.4                      | 18.0                                          |
| 50-59 years       | 13.1                      | 16.7                                          |
| 60-69 years       | 12.5                      | 11.9                                          |
| 70 years and over | 11.4                      | 10.8                                          |

Notes: <sup>1</sup> Source [52]

**Table A2. Education distribution of respondents**

| Education category              | Proportion of respondents | Proportion of Auckland residents <sup>1</sup> |
|---------------------------------|---------------------------|-----------------------------------------------|
| Some or all of secondary school | 14.2                      | 23.6                                          |
| Certificate (1-6)               | 12.4                      | 35.8                                          |
| Diploma (5-7)                   | 14.3                      | 9.6                                           |
| Graduate or post-graduate       | 59.0                      | 31.1                                          |

Notes: <sup>1</sup> Source [53]

**Table A3. Ethnicity distribution of respondents**

| Ethnic category  | Proportion of respondents | Proportion of Auckland residents <sup>1</sup> |
|------------------|---------------------------|-----------------------------------------------|
| European         | 53.3                      | 47.5                                          |
| Māori            | 4.4                       | 10.3                                          |
| Pacific Islander | 4.7                       | 14.1                                          |
| Other            | 37.6                      | 28.1                                          |

Notes: <sup>1</sup> Source [52]

**Table A4. Income distribution of respondents**

| Income category       | Proportion of respondents | Proportion of Auckland residents <sup>1</sup> |
|-----------------------|---------------------------|-----------------------------------------------|
| Less than \$20,000    | 4.3                       | 8.1                                           |
| \$20,000 to \$50,000  | 21.2                      | 18.7                                          |
| \$50,000 to \$70,000  | 18.6                      | 11.3                                          |
| \$70,000 to \$100,000 | 22.0                      | 14.7                                          |
| More than \$100,000   | 33.8                      | 47.0                                          |

Notes: <sup>1</sup> Source [54]
